# Supplementary material for: In vivo vectorization and delivery systems for gene therapies and RNA-based therapeutics in oncology
Source: Royal Society of Chemistry journal article supplement (doi:10.1039/d4nr05371k), 2025-01-01
Supplement: d4nr05371k1.pdf [file d4nr05371k1.pdf]

## Supplementary Tables

### **In vivo vectorization and delivery systems for gene therapies and RNA-based therapeutics in oncology**

Julie Schock Vaiani<sup>a</sup>, Mans Broekgaarden<sup>a</sup>, Jean-Luc Coll<sup>a</sup>, Lucie Sancey<sup>a</sup>, Benoit Busser<sup>\*a,b,c</sup>

---

<sup>a</sup> *Univ. Grenoble-Alpes (UGA), INSERM U1209, CNRS UMR 5309, Institute for Advanced Biosciences, Allée des Alpes, 38000 Grenoble, France. E-mail: bbusser@chu-grenoble.fr*

<sup>b</sup> *Grenoble Alpes Univ. Hospital (CHUGA), 38043 Grenoble, France.*

<sup>c</sup> *Institut Universitaire de France (IUF), 75005 Paris, France.*

**Table S1:** Selection of recent gene therapies using Adenoviral vectors

| Serotype / Modification                                       | Transgene            | Administration         | Cancer                                    | Phase | Sponsor / Investigator                                   | NCT + ASCO                                                                                                                                                                                                                                                                                                                                                            |
|---------------------------------------------------------------|----------------------|------------------------|-------------------------------------------|-------|----------------------------------------------------------|-----------------------------------------------------------------------------------------------------------------------------------------------------------------------------------------------------------------------------------------------------------------------------------------------------------------------------------------------------------------------|
| NA                                                            | HSV-tk               | NA                     | GBM                                       | I/II  | David S Baskin, Houston Methodist Neurological Institute | NCT03596086: <b>Gene Therapy for High Grade Glioma: The Clinical Experience</b><br><br>Varela et Al. <sup>1</sup>                                                                                                                                                                                                                                                     |
| 24-base pair deletion in the E1A gene (replication deficient) | OX40L                | Intra-tumoral          | Resectable Colorectal Liver Metastasis    | I     | DNAtrix, Inc.                                            | NCT04714983: <b>DNX-2440 for Resectable Colorectal Liver Metastasis</b><br><br>Jiang et Al. <sup>2</sup>                                                                                                                                                                                                                                                              |
|                                                               |                      | stereotactic injection | GBM                                       | I     | DNAtrix, Inc                                             | NCT03714334: <b>DNX-2440 Oncolytic Adenovirus for Recurrent Glioblastoma</b><br><br>Jiang et Al. <sup>2</sup>                                                                                                                                                                                                                                                         |
| NA                                                            | p53                  | intra-tumoral          | Solid Tumours                             | II    | MultiVir, Inc.                                           | NCT03544723: <b>Analysis of Adenoviral p53 Gene Therapy Clinical Trials in Recurrent Head and Neck Squamous Cell Carcinoma</b><br><br>Sobol et Al. <sup>3</sup>                                                                                                                                                                                                       |
| Replication deficient                                         | Interferon Alpha-2b  | Intrapleural           | Malignant Pleural Mesothelioma (INFINITE) | III   | Trizell Ltd                                              | NCT03710876: <b>Nadofaragene Firadenovec: First Approval</b><br><br>Lee et al. <sup>4</sup>                                                                                                                                                                                                                                                                           |
| NA                                                            | TMZ-CD40L and 4-1BBL | Intra-tumoral          | advanced pancreatic cancer                | III   | Trizell Ltd                                              | NCT02705196: <b>LOAd703 Oncolytic Virus Therapy for Pancreatic Cancer</b><br><br><b>A phase I/II study of LOAd703, a TMZ-CD40L/4-1BBL-armed oncolytic adenovirus, combined with nab-paclitaxel and gemcitabine in advanced pancreatic cancer</b><br>Musher et Al. <sup>5</sup><br><br><b>LOAd703, an oncolytic virus-based immunost</b><br>Musher et Al. <sup>6</sup> |

|                                                |                                                                                                    |               |                                              |     |                                                       |                                                                                                                                                                                                                                                                                      |
|------------------------------------------------|----------------------------------------------------------------------------------------------------|---------------|----------------------------------------------|-----|-------------------------------------------------------|--------------------------------------------------------------------------------------------------------------------------------------------------------------------------------------------------------------------------------------------------------------------------------------|
| <b>Ad5</b>                                     | yCD/mutTKSR39 (yeast cytidine deaminase/mutant S39R HSV-1 thymidine kinase) and human IL-12 (IL12) | Intra-tumoral | metastatic pancreatic cancer                 | I   | Henry Ford Health System                              | <b>NCT03281382: Phase 1 Trial of Interleukin 12 Gene Therapy for Metastatic Pancreatic Cancer</b><br><br>Phase I trial of oncolytic adenovirus-mediated cytotoxic and interleukin-12 gene therapy for the treatment of metastatic pancreatic cancer<br><br>Barton & Al. <sup>7</sup> |
| <b>Ad-5, EI-deleted Ofranergene obadenovec</b> | Fas-chimera (Fas-c) transgene                                                                      | IV            | recurrent platinum resistant ovarian cancer  | III | Vascular Biogenics Ltd. operating as VBL Therapeutics | <b>NCT03398655: Randomized controlled phase III trial of weekly paclitaxel ± ofranergene obadenovec (VB-111) for platinum-resistant ovarian cancer (OVAL Study/GOG 3018).</b><br>=>no improvement of OS or PFS<br><br>Arend et Al. <sup>8</sup>                                      |
| <b>HER 2 CAR-T + AdV</b>                       | Dual expression of IL-12 and PD-L1 blocker                                                         | Tumour site   | Advanced HER2 Positive Solid Tumours (VISTA) | I   | Shalini Makawita, Baylor College of Medicine          | <b>NCT03740256: Binary oncolytic adenovirus in combination with HER2-specific autologous CAR VST for treatment of advanced HER2-positive solid tumors (VISTA).</b><br><br>Makawita et Al. <sup>9</sup>                                                                               |
| <b>NA</b>                                      | Ad-RTS-hIL-12 (RheoSwitch Therapeutic System = TF) & interleukin-12                                | stereotactic  | Glioblastoma or Malignant Glioma             | I   | Alaunos Therapeutics                                  | <b>NCT02026271: A Study of Ad-RTS-hIL-12 With Veledimex in Subjects With Glioblastoma or Malignant Glioma</b><br><br>Final results of controlled IL-12 monotherapy in adults with grade III or IV gliomas.<br>Chiocca et al. <sup>10</sup>                                           |

**Table S2:** Clinical developments of aglatimagene besadenovec (AglaVec) (CAN-2409): Summary of clinical trials, therapeutic indications, and outcomes using vector particles (VP).

| Cancer                                                                                               | Clinical Development        | Dose and treatment protocol                                                                                                                                                                                                                                                                                                                  | Results                                                                                                                                                                                                                                                                                                                                                                                                                                                                                                                                                                                                                                                                                                                                                                                                                                                                                           | References                                                                                                                                                                                                       |
|------------------------------------------------------------------------------------------------------|-----------------------------|----------------------------------------------------------------------------------------------------------------------------------------------------------------------------------------------------------------------------------------------------------------------------------------------------------------------------------------------|---------------------------------------------------------------------------------------------------------------------------------------------------------------------------------------------------------------------------------------------------------------------------------------------------------------------------------------------------------------------------------------------------------------------------------------------------------------------------------------------------------------------------------------------------------------------------------------------------------------------------------------------------------------------------------------------------------------------------------------------------------------------------------------------------------------------------------------------------------------------------------------------------|------------------------------------------------------------------------------------------------------------------------------------------------------------------------------------------------------------------|
| High grade glioma/<br>Glioblastoma                                                                   | Phase I/II<br>(NCT00870181) | Intra-arterial cerebral infusion ( $1 \times 10^{12}$ viral particles of AglaVec)                                                                                                                                                                                                                                                            | <ul style="list-style-type: none"> <li>- <b>Progression-Free Survival (PFS):</b> ADV-TK treatment significantly improved PFS compared to control, with a median survival of 29.6 weeks versus 7.9 weeks (HR: 0.315, <math>p &lt; 0.001</math>). The benefit was more pronounced in the GBM subgroup, achieving a PFS of 34.9 weeks compared to 9.0 weeks (HR: 0.157, <math>p &lt; 0.001</math>).</li> <li>- <b>Overall Survival (OS):</b> DV-TK markedly extended OS, with a median survival of 45.6 weeks versus 7.9 weeks (HR: 0.207, <math>p &lt; 0.001</math>). The GBM subgroup showed the most significant gain, with an OS of 45.4 weeks compared to 9.6 weeks (HR: 0.125, <math>p &lt; 0.001</math>).</li> <li>- <b>Hazard Ratio (HR):</b> the lower HR values for both PFS and OS demonstrates a substantial survival advantage for ADV-TK, particularly in the GBM subgroup.</li> </ul> | <p><b>Adenovirus-mediated delivery of herpes simplex virus thymidine kinase administration improves outcome of recurrent high-grade glioma</b></p> <p>Ji et al. <sup>11</sup></p>                                |
| Malignant pleural effusion (Lung cancer, Mesothelioma Breast Cancer Ovarian Cancer)                  | Phase I/II<br>(NCT01997190) | <ul style="list-style-type: none"> <li>- <u>Cohort 1:</u> 3 patients received <math>1 \times 10^{12}</math> vp.</li> <li>- <u>Cohort 2:</u> 3 patients received <math>1 \times 10^{13}</math> vp.</li> <li>- <u>Cohort 3:</u> 14 patients enrolled (13 treated) received <math>1 \times 10^{13}</math> vp combined with celecoxib</li> </ul> | <ul style="list-style-type: none"> <li>- Response Evaluation (RECIST): 17 patients were evaluable</li> <li>- Best response: Partial Response (PR) observed in 4 patients, including 3 with MM and 1 with NSCLC.</li> </ul>                                                                                                                                                                                                                                                                                                                                                                                                                                                                                                                                                                                                                                                                        | <p><b>Phase I study of gene mediated cytotoxic immunotherapy (GMCI) for patients with malignant pleural effusion (MPE)</b></p> <p>Aggarwal et al. <sup>12</sup></p>                                              |
| Malignant Glioma (Anaplastic Astrocytoma Glioblastoma Multiforme High Grade Glioma Malignant Glioma) | Phase IIa<br>(NCT00589875)  | Single dose of $3 \times 10^{11}$ vp administered directly to the tumour bed post-resection on day 0                                                                                                                                                                                                                                         | PFS and OS showed moderate improvement                                                                                                                                                                                                                                                                                                                                                                                                                                                                                                                                                                                                                                                                                                                                                                                                                                                            | <p><b>Phase II multicenter study of gene-mediated cytotoxic immunotherapy as adjuvant to surgical resection for newly diagnosed malignant glioma</b></p> <p>Wheeler et Al. <sup>13</sup></p>                     |
| Paediatric Brain Tumours (Malignant Glioma Recurrent Ependymoma)                                     | Phase I<br>(NCT00634231)    | AdV-tk at doses of $1 \times 10^{11}$ and $3 \times 10^{11}$ vp was administered into the tumour bed during surgery, followed by a 14-day course of valacyclovir                                                                                                                                                                             | <ul style="list-style-type: none"> <li>- <u>Patient Enrolment:</u> Eight patients were enrolled and completed therapy (6 glioblastoma, 1 anaplastic astrocytoma, 1 recurrent ependymoma).</li> <li>- <u>Surgical Outcome:</u> Five patients presented with multifocal or extensive tumours that were not fully resectable; three patients underwent gross total resection.</li> <li>- <u>Toxicity:</u> No dose-limiting toxicities were identified.</li> <li>- <u>Adverse Events:</u> The most common GMCI-related adverse events</li> </ul>                                                                                                                                                                                                                                                                                                                                                      | <p><b>Phase I study of gene-mediated cytotoxic immunotherapy with AdV-tk as adjuvant to surgery and radiation for pediatric malignant glioma and recurrent ependymoma</b></p> <p>Kieran et al. <sup>14</sup></p> |

|                    |                                     |                                                                                                                                                                                                                                                                                                |                                                                                                                                                                                                                                                                                                                     |                                                                                                                                                                                                                               |
|--------------------|-------------------------------------|------------------------------------------------------------------------------------------------------------------------------------------------------------------------------------------------------------------------------------------------------------------------------------------------|---------------------------------------------------------------------------------------------------------------------------------------------------------------------------------------------------------------------------------------------------------------------------------------------------------------------|-------------------------------------------------------------------------------------------------------------------------------------------------------------------------------------------------------------------------------|
|                    |                                     |                                                                                                                                                                                                                                                                                                | <p>were grade 1–2 fever, fatigue, and nausea/vomiting.</p> <p>- <u>Long-Term Survival</u>: Three patients on dose level 2 achieved survival beyond 24 months, with two remaining progression-free at 37.3 and 47.7 months post-AdV-tk injection.</p>                                                                |                                                                                                                                                                                                                               |
| Pancreatic cancer  | Phase II (NCT02446093) + FAST TRACK | NA                                                                                                                                                                                                                                                                                             | <p>- OS Patients treated with CAN-2409 achieved a median OS of 28.8 months compared to 12.5 months in the control group.</p> <p>- 24-Month OS Rate: 71.4% for CAN-2409 vs 16.7% for the standard-of-care (SOC) group</p> <p>- 36-Month OS Rate: Estimated at 47.6% for CAN-2409 vs 16.7% for the control group</p>  | <p><b>Candel Therapeutics receives FDA fast track designation for CAN-2409 in pancreatic cancer</b></p> <p>Ref <sup>15</sup></p>                                                                                              |
| Prostate cancer    | Phase II (ULYSSES) (NCT02768363)    | NA                                                                                                                                                                                                                                                                                             | NA                                                                                                                                                                                                                                                                                                                  | <p><b>Immunotherapy in prostate cancer: new horizon of hurdles and hopes</b></p> <p>Tsaur et al. <sup>16</sup></p>                                                                                                            |
| Stage III/IV NSCLC | Phase II (NCT04495153)              | Two doses of CAN-2409 (5 × 10 <sup>11</sup> vp) were administered 5–7 weeks apart via bronchoscopic or percutaneous injection into the lung tumour, disease-positive lymph node, or peripheral metastasis.<br><u>Adjuvant Therapy</u> : Each dose was followed by oral prodrug administration. | <p>- mOS: 20.6 months, exceeding standard chemotherapy outcomes.</p> <p>- 90% of patients: Stage IV disease.</p> <p>- Abscopal effect: &gt;70% with at least one uninjected lesion.</p> <p>- 1–2 tumour injections sufficient to train immune cells.</p> <p>- Systemic and durable antitumor activity observed.</p> | <p><b>Overall survival after treatment with CAN-2409 plus valacyclovir in combination with continued ICI in patients with stage III/IV NSCLC with an inadequate response to ICI.</b></p> <p>Aggarwal et al. <sup>17</sup></p> |

**Table S3:** CF33 clinical developments

| Cancer                                                                                                                        | Clinical Development  | Status                | Dose                                                                                                                                                                                                                                                                                                  | Results                                                                 | References                                                                                                                                                                               |
|-------------------------------------------------------------------------------------------------------------------------------|-----------------------|-----------------------|-------------------------------------------------------------------------------------------------------------------------------------------------------------------------------------------------------------------------------------------------------------------------------------------------------|-------------------------------------------------------------------------|------------------------------------------------------------------------------------------------------------------------------------------------------------------------------------------|
| Metastatic or Advanced Solid Tumours (MAST)                                                                                   | Phase 1 (NCT05346484) | Recruiting            | CF33-hNIS administered IT or IV, alone or in combination with pembrolizumab in patients with advanced or metastatic solid tumours with $\geq 2$ prior lines of therapy                                                                                                                                | NA                                                                      | <b>Oncolytic virus CF33-hNIS monotherapy for the treatment of gastrointestinal (GI) malignancies.</b><br><br>Li et al. <sup>18</sup>                                                     |
| Anatomic Stage IV Breast Cancer AJCC<br>Metastatic Triple-Negative Breast Carcinoma<br>Prognostic Stage IV Breast Cancer AJCC | Phase I (NCT05081492) | Active not recruiting | intratumorally at one of 8 assigned dose levels ( $1 \times 10^5$ PFU, $3 \times 10^5$ PFU, $1 \times 10^6$ PFU, $3 \times 10^6$ PFU, $1 \times 10^7$ PFU, $3 \times 10^7$ PFU, $1 \times 10^8$ PFU, $3 \times 10^8$ PFU) on Days 1 and 15 of each 28-day cycle for a total of 3 cycles of treatment. | Ongoing Trial: No results posted: but CASE REPORT with positive results | <b>CF33-hNIS-anti-PD-L1 oncolytic virus followed by trastuzumab-deruxtecan in a patient with metastatic triple negative breast cancer: a case study</b><br><br>Yuan et al. <sup>19</sup> |
| Advanced or Metastatic Solid Tumours                                                                                          | Phase 1 (NCT06063317) | Recruiting            | 3+3 dose escalation scheme independently of each route of CF33-CD19 administration (IT and IV) with dose levels of CF33-CD19 ranging from $1.0 \times 10^7$ to $3.0 \times 10^9$ PFU                                                                                                                  | NA                                                                      | <b>Combination therapy with the oncolytic virus CF33-CD19 and blinatumomab for the treatment of advanced solid tumors.</b><br><br>Li & al. <sup>20</sup>                                 |

**Table S4:** Important parameters for nanoparticles formulation and characterization

| Character              | Parameters                      | Definition                                                                                                                                                                                                                          | References                                                              |
|------------------------|---------------------------------|-------------------------------------------------------------------------------------------------------------------------------------------------------------------------------------------------------------------------------------|-------------------------------------------------------------------------|
| <b>Morphology</b>      | <b>Size</b>                     | The physical dimensions of nanoparticles, typically measured in nanometres (nm), significantly influence their biological fate, including cellular uptake, biodistribution, and tissue penetration.                                 | <b>Nanodelivery of nucleic acids</b><br><br>Mendes et Al. <sup>21</sup> |
|                        | <b>Polydispersity</b>           | The variation in nanoparticle size within a formulation is quantified using the polydispersity index (PDI). A low PDI indicates uniformity, enhancing reproducibility, stability, and controlled drug release.                      |                                                                         |
|                        | <b>Shape</b>                    | The geometric form of nanoparticles—spherical, rod-like, or irregular—impacts their biodistribution, cellular interactions, and clearance rates, influencing therapeutic efficiency and biological functionality.                   |                                                                         |
| <b>Surface charge</b>  | <b>Zeta potential</b>           | The surface charge of nanoparticles, measured at the slipping plane in a colloidal system, determines their stability, aggregation behaviour, and interaction with biological membranes, affecting circulation and cellular uptake. |                                                                         |
|                        | <b>Hydrophobicity</b>           | The degree to which nanoparticle surfaces repel water influences their dispersibility, stability, and interaction with biological systems, playing a critical role in cellular uptake and protein corona formation.                 |                                                                         |
|                        | <b>Stability</b>                | The ability of nanoparticles to resist aggregation or degradation over time ensures consistent size distribution, biological activity, and therapeutic performance.                                                                 |                                                                         |
| <b>Composition</b>     | <b>Encapsulation efficiency</b> | The proportion of the therapeutic agent successfully loaded into nanoparticles relative to the total input, which directly impacts drug dosage, bioavailability, and therapeutic efficacy.                                          |                                                                         |
|                        | <b>Molecular Ratio</b>          | The ratio of nanoparticle components (e.g., drug-to-carrier or lipid-to-polymer) is critical for optimizing formulation stability, release profiles, and overall performance.                                                       |                                                                         |
| <b>Surface coating</b> | <b>Targeting molecules</b>      | Ligands, antibodies, or peptides conjugated to the nanoparticle surface enable selective binding to target cells or tissues, enhancing precision and minimizing off-target effects in drug delivery.                                |                                                                         |
|                        | <b>Stealth</b>                  | Surface modifications, such as PEGylation, reduce nanoparticle recognition by the immune system, thereby extending circulation time, improving systemic stability, and enhancing therapeutic delivery to target sites.              |                                                                         |

**Table S5:** Targeting molecules and cancer targets in NP-based drug and gene delivery systems

| Ligand for functionalizing NPs                                                    | Target (Cancer cell surface or intracellular binding site) | References                                                                                                                                                                                    |
|-----------------------------------------------------------------------------------|------------------------------------------------------------|-----------------------------------------------------------------------------------------------------------------------------------------------------------------------------------------------|
| Folate (small molecule)                                                           | Folate Receptor                                            | <b>Promising Nanocarriers for PEDF Gene Targeting Delivery to Cervical Cancer Cells Mediated by the Over-expressing FR<math>\alpha</math></b><br>Gladkikh et al. <sup>22</sup>                |
| Transferrin Receptor (scFv = single chain fragment)                               | Transferrin                                                | <b>Brain tumor-targeted therapy by systemic delivery of siRNA with Transferrin receptor-mediated core-shell nanoparticles</b><br>Wei et al. <sup>23</sup>                                     |
| Hyaluronic Acid (Polysaccharide)                                                  | CD44                                                       | <b>Recent advances in liposome-based targeted cancer therapy</b><br>Fidan et al. <sup>24</sup>                                                                                                |
| Trastuzumab (Anti-HER2 antibody)                                                  | HER-2 (ErbB2)                                              | <b>Tumor-Directed Targeting of Liposomes</b><br>Park <sup>25</sup>                                                                                                                            |
| Fab' fragments of cetuximab (Anti-EGFR antibody)                                  | EGFR (ErbB1)                                               | <b>Epidermal Growth Factor Receptor-Targeted Immunoliposomes Significantly Enhance the Efficacy of Multiple Anticancer Drugs In vivo</b><br>Mamot et al. <sup>26</sup>                        |
| Anti-mesothelin antibody                                                          | Mesothelin                                                 | <b>Mesothelin-mediated targeting of adenoviral vectors for ovarian cancer gene therapy</b><br>Breidenbach et al. <sup>27</sup>                                                                |
| TAT (cell penetrating peptide)<br>+ MMP2 peptide sequence<br>+ Anti-HER2 antibody | MMP2 (enzyme)<br>HER 2 (ErbB2)                             | <b>Intelligent TAT-coupled anti-HER2 immunoliposomes knock down MDR1 to produce chemosensitize phenotype of multidrug resistant carcinoma</b><br>Gholamian Dehkordi et al. <sup>28</sup>      |
| Dexamethasone                                                                     | Glucocorticoid receptor                                    | <b>Functionalized PDA/DEX-PEI@HA nanoparticles combined with sleeping-beauty transposons for multistage targeted delivery of CRISPR/ Cas9 gene</b><br>Ma et al. <sup>29</sup>                 |
| Aptamer (G-rich DNA oligonucleotide of 5-10nm)                                    | Nucleolin                                                  | <b>Co-Delivery of Paclitaxel and PLK1-Targeted siRNA Using Aptamer-Functionalized Cationic Liposome for Synergistic Anti-Breast Cancer Effects <i>In Vivo</i></b><br>Yu, et al. <sup>30</sup> |



**Table S6:** Overview of key lipid components in lipid nanoparticles (LNPs) and liposomal formulations.

| Type of lipid                                                   | Role                                                                                                                                                                                                                                                                                                                                                  | Name     | Characteristics                                                                                                                                                                                                       |
|-----------------------------------------------------------------|-------------------------------------------------------------------------------------------------------------------------------------------------------------------------------------------------------------------------------------------------------------------------------------------------------------------------------------------------------|----------|-----------------------------------------------------------------------------------------------------------------------------------------------------------------------------------------------------------------------|
| <b>Ionizable / Cationic Lipid (major component of LNP ~50%)</b> | <p>- Provide a positive charge to LNPs/liposomes, enabling interaction with negatively charged nucleic acids</p> <p>- Contribute to nanoparticle biodegradability</p> <p>- Ionizable lipids are critical for forming destabilizing non-bilayer structures at acidic pH, facilitating endosomal escape and efficient RNA delivery into the cytosol</p> | DOTMA    | <b>Monovalent cationic</b><br>Quaternary ammonium head with ether bonds<br>Commonly used in lipoplexes (e.g., BioNTech formulations)<br>Lipofectamine = DOTMA + DOPE, however, ether bonds contribute to cytotoxicity |
|                                                                 |                                                                                                                                                                                                                                                                                                                                                       | DOTAP    | <b>Monovalent cationic</b><br>Monovalent cationic lipid with a quaternary amine and ester bonds<br>More biodegradable than DOTMA due to its hydrolysable ester linkage                                                |
|                                                                 |                                                                                                                                                                                                                                                                                                                                                       | DDAB     | <b>Monocationic</b><br>Monocationic lipid with a quaternary ammonium head and alkyl (C–N) bonds                                                                                                                       |
|                                                                 |                                                                                                                                                                                                                                                                                                                                                       | DODMA    | <b>Ionizable monovalent cationic lipidic</b><br>Tertiary amine with ester bonds<br>Protonated at physiological pH (pKa = 6.59), offering improved biodegradability over quaternary amines                             |
|                                                                 |                                                                                                                                                                                                                                                                                                                                                       | DODAP    | <b>Ionizable lipid</b><br>Tertiary amine with ester bond<br>Effective for endosomal escape at acidic pH (pKa = 5,59)                                                                                                  |
|                                                                 |                                                                                                                                                                                                                                                                                                                                                       | DOSPA    | <b>Polycationic lipid</b><br>Polycationic spermine-based lipid with ether and carboxamide bonds<br>Forms strong electrostatic interactions with nucleic acids, increasing positive charge density                     |
|                                                                 |                                                                                                                                                                                                                                                                                                                                                       | GL-67    | <b>Polycationic lipid</b><br>Polycationic spermine-based lipid with ether bonds<br>Simplified structure compared to DOSPA, improving ease of synthesis                                                                |
|                                                                 |                                                                                                                                                                                                                                                                                                                                                       | DOGS     | <b>Polycationic lipid</b><br>Polycationic spermine-based lipid with amide bonds<br>Amide bonds enhance stability but reduce biodegradability, leading to slower breakdown in vivo.                                    |
|                                                                 |                                                                                                                                                                                                                                                                                                                                                       | Dlin-DMA | <b>Ionizable lipid</b><br>Tertiary amine with ester linker (pKa = 6.0)<br>A linolyl analogue of DODMA, enhancing structural versatility<br>Dlin-MC3-DMA is used for the approved Onpattro                             |
|                                                                 |                                                                                                                                                                                                                                                                                                                                                       | SM-102   | <b>Ionizable lipid</b><br>Ionizable lipid (pKa = 6.68) with a tertiary amine, hydroxyalkyl group and branched 3-tail structure with ester bond<br>Used in Moderna's mRNA-1273 vaccine                                 |
| ALC-0315                                                        | <b>Synthetic ionizable lipid</b><br>Ionizable lipid (pKa = 6.09) with a tertiary amine, hydroxyalkyl group, and branched four short tails with ester bonds.<br>Used in Pfizer/BioNTech mRNA vaccines                                                                                                                                                  |          |                                                                                                                                                                                                                       |
| C14.4                                                           | <b>Ionizable monoationic lipid</b><br>Ionizable lipid (pKa = 6.5) with a tertiary amine and ether bonds                                                                                                                                                                                                                                               |          |                                                                                                                                                                                                                       |
| <b>Ionizable</b>                                                | - Facilitates stable nanoparticle                                                                                                                                                                                                                                                                                                                     | DOPA     | ionizable anionic lipid with a phosphatidic acid head group and ester bonds.                                                                                                                                          |

|                                        |                                                                                                                                                                                                                                                                                                                                  |                 |                                                                                                                                                                                                                                                                                  |
|----------------------------------------|----------------------------------------------------------------------------------------------------------------------------------------------------------------------------------------------------------------------------------------------------------------------------------------------------------------------------------|-----------------|----------------------------------------------------------------------------------------------------------------------------------------------------------------------------------------------------------------------------------------------------------------------------------|
| <b>anionic Lipid</b>                   | formation by neutralizing excess positive charge<br>- Enhances membrane fusion and transfection efficiency                                                                                                                                                                                                                       |                 | Negatively charged at physiological pH, contributing to nanoparticle stability and transfection capabilities                                                                                                                                                                     |
| <b>Phospholipid (neutral)</b>          | - Provides structural rigidity and stability to nanoparticles.<br><br>-Enhances transfection efficiency                                                                                                                                                                                                                          | DSPC            | <b>Phosphatidylcholine based lipid</b>                                                                                                                                                                                                                                           |
|                                        |                                                                                                                                                                                                                                                                                                                                  | 18:1EPC         |                                                                                                                                                                                                                                                                                  |
|                                        |                                                                                                                                                                                                                                                                                                                                  | DOPC            |                                                                                                                                                                                                                                                                                  |
|                                        |                                                                                                                                                                                                                                                                                                                                  | POPC            |                                                                                                                                                                                                                                                                                  |
|                                        | -Prevents nanoparticle aggregation, ensuring uniform dispersion and performance                                                                                                                                                                                                                                                  | HSPC            | <b>Phosphatidylethanolamine based lipid</b>                                                                                                                                                                                                                                      |
|                                        |                                                                                                                                                                                                                                                                                                                                  | DSPE            |                                                                                                                                                                                                                                                                                  |
|                                        |                                                                                                                                                                                                                                                                                                                                  | DOPE            |                                                                                                                                                                                                                                                                                  |
|                                        |                                                                                                                                                                                                                                                                                                                                  | DPPE            |                                                                                                                                                                                                                                                                                  |
|                                        | POPE                                                                                                                                                                                                                                                                                                                             |                 |                                                                                                                                                                                                                                                                                  |
| <b>Cholesterol</b>                     | - Enhances nanoparticle stability and facilitates membrane fusion                                                                                                                                                                                                                                                                | DC-Cholesterol, | Cholesterol derivative                                                                                                                                                                                                                                                           |
|                                        |                                                                                                                                                                                                                                                                                                                                  | Beta-Sitosterol | Plant-based cholesterol analogue                                                                                                                                                                                                                                                 |
|                                        | - Provides structural rigidity and integrity to lipid nanoparticles<br><br>- Reduces surface protein binding, improving circulation time and reducing immune clearance                                                                                                                                                           | SM-Chol         | Cholesterol derivative with sphingomyeline (major component of cellular membranes). Enhances the structural integrity of lipid-based drug delivery systems, making them more stable, biocompatible, and effective in delivering therapeutic agents over longer periods.          |
| <b>PEGylated-Lipid (stealth lipid)</b> | - Enhances colloidal stability of nanoparticles<br>- Provides stealth properties by reducing opsonization, protecting nucleic acids from immune system recognition and degradation<br>- Prolongs circulation time in the bloodstream and delays uptake by the mononuclear phagocyte system (MPS), improving therapeutic efficacy | C-DMG-PEG(2000) | PEGylated lipid<br>Used in mRNA COVID-19 vaccine LNP (Moderna)                                                                                                                                                                                                                   |
|                                        |                                                                                                                                                                                                                                                                                                                                  | ALC-0159        | PEGylated lipid<br>Used in mRNA vaccines LNP (BioNTech/Pfizer)                                                                                                                                                                                                                   |
|                                        |                                                                                                                                                                                                                                                                                                                                  | DSG-PEG(2000)   | PEGylated lipid with a 2000 Da PEG chain<br>DSG (Distearoyl-glycerol) is a glycerol-based lipid with two stearyl chains, enhancing integration into cellular lipid bilayers.<br>Provides improved nanoparticle stability, reduced immunogenicity, and prolonged circulation time |

Information adapted from Wang et al. <sup>31</sup>, Cardarelli et al. <sup>32</sup>, Jörgensen et al. <sup>33</sup>, Funakoshi et al. <sup>34</sup>, Wang et al. <sup>35</sup>, Cullis & Felgner <sup>36</sup>

**Table S7:** Overview of ongoing clinical trials utilising liposomes for nucleic acid delivery.

| Composition                        | NAs                                        | Administration | Cancer                         | Phase | Sponsor                     | NCT + ASCO                                                                                                                                                                                                                                                    |
|------------------------------------|--------------------------------------------|----------------|--------------------------------|-------|-----------------------------|---------------------------------------------------------------------------------------------------------------------------------------------------------------------------------------------------------------------------------------------------------------|
| DOPC                               | EphA2 siRNA                                | IV             | Solid tumours                  | I     | M.D. Anderson Cancer Center | NCT01591356<br><br><b>EphA2 gene targeting using neutral liposomal small interfering RNA (EPHARNA) delivery: A phase I clinical trial.</b><br><br>Naing et al. <sup>37</sup>                                                                                  |
| Amphoteric liposomes (SMARTICLES®) | Double stranded RNA to activate CEBPA gene | IV             | Advanced liver cancer          | I     | Mina Alpha Limited          | NCT02716012<br><br><b>Phase Ib dose escalation and cohort expansion study of the novel myeloid differentiating agent MTL-CEBPA in combination with sorafenib in patients with advanced hepatocellular carcinoma (HCC).</b><br><br>Sarker et al. <sup>38</sup> |
| DOPC                               | ASO Bcl2                                   | IV             | Advanced Lymphoid Malignancies | I     | Bio-Path Holdings, Inc.     | NCT04072458<br><br><b>Making Sense of Antisense Oligonucleotide Therapeutics Targeting Bcl-2</b><br><br>Gagliardi & Ashizawa <sup>39</sup>                                                                                                                    |

**Table S8:** Overview of ongoing clinical trials utilising lipoplexes for nucleic acid delivery.

| Platforms                                        | Composition | NAs                                                                                                                  | R.A. | Cancer                                                                        | Phase    | Sponsor                       | NCT + ASCO                                                                                                                                                                                                    |
|--------------------------------------------------|-------------|----------------------------------------------------------------------------------------------------------------------|------|-------------------------------------------------------------------------------|----------|-------------------------------|---------------------------------------------------------------------------------------------------------------------------------------------------------------------------------------------------------------|
| Individualized Neoantigen Specific Immunotherapy | DOTMA       | mRNA RO7198457 (=BNT122, = RO7198457) encoding patient specific TSA                                                  | IV   | Untreated Advanced Melanoma                                                   | II       | BioNTech SE / Genentech, Inc. | NCT03815058:<br><b>Adoptive Cell Transfer and Vaccines in Melanoma: The Horizon Comes Into View</b><br>Betof-Warner et al. <sup>40</sup>                                                                      |
|                                                  |             |                                                                                                                      |      | NSCLC                                                                         | II       |                               | NCT04267237<br><b>The clinical progress of mRNA vaccines and immunotherapies</b><br>Barbier & Al. <sup>41</sup>                                                                                               |
|                                                  |             |                                                                                                                      |      | ctDNA-positive, Resected Stage II (High Risk) and Stage III Colorectal Cancer | II       |                               | NCT04486378<br><b>A phase 2 multicenter trial in patients with stage II/III colorectal cancer to compare efficacy of autogene cevumeran versus waiting.</b><br>Kopetz et al. <sup>42</sup>                    |
|                                                  |             |                                                                                                                      |      | Solid tumour                                                                  | I        |                               | NCT03289962                                                                                                                                                                                                   |
| FixVac (Fixed Vaccine)                           | DOTMA       | mRNA encoding for TSA (BNT111)                                                                                       | IV   | Advanced melanoma                                                             | II       | BioNTech SE                   | NCT04526899                                                                                                                                                                                                   |
|                                                  |             | mRNA encoding viral antigen (TSA) (BNT113)                                                                           |      | HPV16-positive head and neck cancer                                           | II       |                               | NCT04534205:<br><b>Breaking Ground in Recurrent or Metastatic Head and Neck Squamous Cell Carcinoma: Novel Therapies Beyond PD-L1 Immunotherapy</b><br>Rosenberg et al. <sup>43</sup>                         |
|                                                  |             | mixture of six liposomally formulated RNAs each of which encodes for a different tumour-associated antigen. (BNT116) |      | 1 <sup>st</sup> line metastatic NSCLC Advanced/metastatic NSCLC               | I        |                               | NCT05142189                                                                                                                                                                                                   |
|                                                  | DOTAP:Chol  | P(plasmid)bi-shRNA <sup>TM</sup> EWS/FLI1 Type 1                                                                     | IV   | Advanced Ewing's Sarcoma                                                      | I        | Gradalis, Inc.                | NCT02736565<br><b>Pbi-shRNA<sup>TM</sup> EWS/FLI1 Type 1 LPX in Subjects With Advanced Ewing's Sarcoma</b><br>Rao et al. <sup>44</sup>                                                                        |
| SGT 53                                           | DOTAP: DOPE | pcDNA53                                                                                                              | IV   | Metastatic Pancreatic Cancer                                                  | II > III | SynerGene Therapeutics, Inc.  | NCT02340117<br><b>A phase II trial combining tumor-targeting TP53 gene therapy with gemcitabine/nab-paclitaxel as a second-line treatment for metastatic pancreatic cancer.</b><br>Leung et al. <sup>45</sup> |

**Table S9:** Overview of ongoing clinical trials utilising LNPs for nucleic acid delivery.

| NAs                                                                                                                                                                                                         | Administration | Cancer                     | Phase | Sponsor                   | NCT + ASCO                                                                                                                                                                                                                                                                                                                |
|-------------------------------------------------------------------------------------------------------------------------------------------------------------------------------------------------------------|----------------|----------------------------|-------|---------------------------|---------------------------------------------------------------------------------------------------------------------------------------------------------------------------------------------------------------------------------------------------------------------------------------------------------------------------|
| mRNA-4157: Modified to encode patient-specific tumour antigens for Individualised Neoantigen Therapy (INT). V940 (formerly mRNA-4157) encodes up to 34 tumour-derived neoantigens tailored for each patient | IV             | Melanoma                   | II    | Moderna Therapeutics Inc. | NCT03897881 (KEYNOTE-942)<br><br><b>Distant metastasis-free survival results from the randomized, phase 2 mRNA-4157-P201/KEYNOTE-942 trial.</b><br>Khattak et al. <sup>46</sup><br><br><b>Personalized anti-cancer vaccine combining mRNA and immunotherapy tested in melanoma trial</b><br>Carvalho et al. <sup>47</sup> |
|                                                                                                                                                                                                             | IM             | Melanoma                   | III   | Merck Sharp & Dohme LLC   | NCT05933577<br><br><b>INTerpath-001: Pembrolizumab with V940 (mRNA-4157) versus pembrolizumab with placebo for adjuvant treatment of high-risk stage II-IV melanoma.</b><br>Jeffrey S. Weber & Al. <sup>48</sup>                                                                                                          |
|                                                                                                                                                                                                             | IM             | Non-small Cell Lung Cancer | III   | Merck Sharp & Dohme LLC   | NCT06077760<br><br><b>The phase 3 INTerpath-002 study design: Individualized neoantigen therapy (INT) V940 (mRNA-4157) plus pembrolizumab vs placebo plus pembrolizumab for resected early-stage non-small-cell lung cancer (NSCLC).</b><br>Lee et al. <sup>49</sup>                                                      |
| mRNA encoding cytokines: Includes OX40L, IL-23, and IL-36γ to stimulate immune responses                                                                                                                    | Intratumoral   | Solid tumours and lymphoma | I     | ModernaTX, Inc.           | NCT03739931<br><br><b>A phase I study of mRNA-2752, a lipid nanoparticle encapsulating mRNAs encoding human OX40L, IL-23, and IL-36γ, for intratumoral (iTu) injection alone and in combination with durvalumab.</b><br>Patel & Al. <sup>50</sup>                                                                         |

|                                                                                                              |     |                                                                              |      |                    |                                                                                                                                                                                                                                                                                                                                                                                                                         |
|--------------------------------------------------------------------------------------------------------------|-----|------------------------------------------------------------------------------|------|--------------------|-------------------------------------------------------------------------------------------------------------------------------------------------------------------------------------------------------------------------------------------------------------------------------------------------------------------------------------------------------------------------------------------------------------------------|
|                                                                                                              |     |                                                                              |      |                    |                                                                                                                                                                                                                                                                                                                                                                                                                         |
| mRNA encoding MYC:<br>Therapeutic vaccine targeting the oncogene MYC                                         | IV  | HCC and other solid tumour types known for association with the MYC oncogene | I/II | Omega Therapeutics | NCT05497453<br><br><b>A phase 1/2 open-label study to evaluate the safety, tolerability, pharmacokinetics, pharmacodynamics, and preliminary antitumor activity of OTX-2002 as a single agent and in combination with standard of care in patients with hepatocellular carcinoma and other solid tumor types known for association with the MYC oncogene (MYCHELANGELO I).</b><br>Rodriguez-Rivera et al. <sup>51</sup> |
| mRNA-4359: Encodes PD-L1 and IDO1 antigens for immunotherapeutic vaccination                                 | IM  | Advanced Solid Tumours                                                       | I/II | ModernaTX, Inc.    | NCT05533697<br><br><b>Phase 1/2 study of mRNA-4359 administered alone and in combination with immune checkpoint blockade in adult participants with advanced solid tumors.</b><br>Powderly & Al. <sup>52</sup>                                                                                                                                                                                                          |
| BNT142: Encodes a bispecific antibody targeting CLDN6 (an oncofoetal antigen) and CD3 for T-cell engagement. | IV  | Claudin 6 (CLDN6)-positive advanced tumours.                                 | I/II | BioNTech SE        | NCT05262530<br><br><b>A phase I/II dose escalation trial with expansion cohorts to evaluate safety and preliminary efficacy of BNT142 in patients with prospectively confirmed claudin 6-positive solid tumors.</b><br>Yap et al. <sup>53</sup>                                                                                                                                                                         |
| BNT152/153: Encodes IL-7 (BNT152) or other cytokine-modulating mRNAs for enhanced immune function.           | N/A | various solid tumour indications                                             | I    | BioNTech SE        | NCT04710043<br><br><b>A systematic review of interleukin-2-based immunotherapies in clinical trials for cancer and autoimmune diseases</b><br>Raeber et al. <sup>54</sup>                                                                                                                                                                                                                                               |

|                                                                                                                                                                        |    |                                                                                                       |        |                       |                                                                                                                                                                                                                                                                                                               |
|------------------------------------------------------------------------------------------------------------------------------------------------------------------------|----|-------------------------------------------------------------------------------------------------------|--------|-----------------------|---------------------------------------------------------------------------------------------------------------------------------------------------------------------------------------------------------------------------------------------------------------------------------------------------------------|
| Glioblastoma-targeted mRNA:<br>Encodes a fusion protein with eight tumour-associated epitopes relevant to glioblastoma, incorporating both HLA class I and II epitopes | IM | Resected Glioblastoma (GBM) or Astrocytoma<br>With a Molecular Signature of Unmethylated Glioblastoma | I      | CureVac SE            | NCT05938387<br><br><b>Phase 1 dose-finding study to evaluate safety and tolerability of CVGBM in patients with newly diagnosed and surgically resected MGMT-unmethylated glioblastoma.</b><br>Tabatabai et al. <sup>55</sup>                                                                                  |
| Viral antigen mRNA                                                                                                                                                     | IM | Epstein-Barr Virus-related Refractory Malignant Tumours                                               | I      | WestGene Biopharma    | NCT05714748<br><br><b>Safety, tolerability, and immunogenicity of WGc-043 in subjects with EBV-positive cancers: Results from an investigator-initiated trial.</b><br>Peng et al. <sup>56</sup>                                                                                                               |
| Increasing doses of repeated boosts with a self-amplifying mRNA encoding a neo-antigen (after AdV injection)                                                           | IM | advanced metastatic solid tumours                                                                     | I      | Gritstone bio, Inc.   | NCT03953235<br><br><b>Personalized viral-based prime/boost immunotherapy targeting patient-specific or shared neoantigens: Immunogenicity, safety, and efficacy results from two ongoing phase I studies.</b><br>Drake et al. <sup>57</sup>                                                                   |
| self-amplifying mRNA vector encoding 2 neoantigens (GRT-R902)<br><br>+ GRT-C901-adenoviral vector                                                                      | SC | newly diagnosed metastatic colorectal cancer                                                          | II/III | Gritstone bio, Inc.   | NCT0514172<br><br><b>Phase 2/3, randomized, open-label study of an individualized neoantigen vaccine (self-amplifying mRNA and adenoviral vectors) plus immune checkpoint blockade as maintenance for patients with newly diagnosed metastatic colorectal cancer (GRANITE).</b><br>Hecht et al. <sup>58</sup> |
| siRNA (NBF-006): Targets GSTP (glutathione S-transferase P) to inhibit tumour proliferation                                                                            | IV | advanced non-small cell lung (NSCLC), pancreatic (PANC), or colorectal cancer (CRC)                   | I      | Nitto BioPharma, Inc. | NCT03819387<br><br><b>First-in-human dose-escalation study of NBF-006, a novel investigational siRNA targeting GSTP, in patients with non-small cell lung, pancreatic, or colorectal cancer.</b><br>Tolcher et al. <sup>59</sup>                                                                              |

**Table S10:** Overview of the main polymers used for nucleic acids delivery nucleic acid delivery.

| Type of polymers | Role                                                            | Synthetic Or Natural | Name / Family                                                                                                                      | Advantage                                                                                                                           | Challenges                                                                                                |                                                                                                           |
|------------------|-----------------------------------------------------------------|----------------------|------------------------------------------------------------------------------------------------------------------------------------|-------------------------------------------------------------------------------------------------------------------------------------|-----------------------------------------------------------------------------------------------------------|-----------------------------------------------------------------------------------------------------------|
| Cationic         | Gene delivery via electrostatic interactions with nucleic acids | Synthetic            | Polyethyleneimine (PEI)<br>(branched or linear) 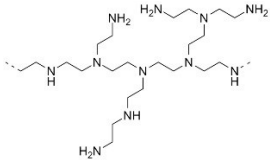 | High transfection efficiency                                                                                                        | Toxicity and limited biodegradability due to the presence of non-degradable vinyl (-C=C-) and amide bonds |                                                                                                           |
|                  |                                                                 |                      | PBAE (linear)                                    | Low toxicity<br>Enhanced transfection efficiency<br>Proton sponge for endosomal escape                                              |                                                                                                           |                                                                                                           |
|                  |                                                                 |                      | PDMAEMA (branched or linear)                      | Chemical flexibility                                                                                                                |                                                                                                           |                                                                                                           |
|                  |                                                                 |                      | PAA (hyperbranched)                             | Low toxicity<br>Enhanced transfection efficiency                                                                                    |                                                                                                           | Complex synthesis, optimization of disulphide linkages                                                    |
|                  |                                                                 |                      | PLL (linear or branched: dendrimer)            | Advantages include gene delivery facilitated by hydrolysable ester bonds, high biocompatibility, and efficient nucleic acid binding |                                                                                                           | Potential toxicity associated with high molecular weight and non-biodegradability in certain formulations |



|                                     |                                                                                                                                                              |           |                                                                                                                                          |                                                                                                                                                    |                                                                                                 |
|-------------------------------------|--------------------------------------------------------------------------------------------------------------------------------------------------------------|-----------|------------------------------------------------------------------------------------------------------------------------------------------|----------------------------------------------------------------------------------------------------------------------------------------------------|-------------------------------------------------------------------------------------------------|
|                                     |                                                                                                                                                              |           | <p>Histidine-Lysine Co-polymers (HKP)</p> <p>R: KHKHKHKHKGKHKHKHKHKHK (HKseries) or KHKHKHKHKHKHKHKHKHKHK (HKseries)</p> <p>2 branch</p> | Efficient endosomal escape, siRNA and DNA complexation                                                                                             | Potential cytotoxicity, Serum stability                                                         |
|                                     |                                                                                                                                                              | Natural   | <p>Chitosan (CS) (linear)</p>                                                                                                            | Biocompatibility and biodegradability                                                                                                              | Low solubility under physiological conditions                                                   |
|                                     |                                                                                                                                                              |           | <p>Hyaluronic acid (HA) + cationic polymers</p>                                                                                          | Biocompatibility, CD44 receptor targeting                                                                                                          | Must be combined with cationic polymers for gene complexation                                   |
| Neutral (hydrophobic non-ionizable) | Controlled drug release, structural support                                                                                                                  | Synthetic | <p>PLGA (Copolymer) = Poly (Lactic-co-Glycolic acid)</p>                                                                                 | biodegradability through glycolic and lactic acids, high biocompatibility, and FDA approval for GMP manufacturing                                  | Hydrophobicity, often requires cationic polymers for gene delivery<br>Low nucleic acid loading, |
|                                     |                                                                                                                                                              |           | <p>PMPC-25</p>                                                                                                                           | Anti-fouling properties<br>High biocompatibility<br>Minimised immune response                                                                      | Limited transfection efficiency for gene delivery                                               |
|                                     |                                                                                                                                                              | Natural   | <p>Cyclodextrin</p>                                                                                                                      | Biocompatible<br>Facilitates drug solubilization and complexation<br>Oral administration possible                                                  | Limited stability in physiological conditions                                                   |
| Anionic                             | Neutralize the positive charge of cationic polymers, enhancing nanoparticle stability and reducing the cytotoxicity associated with highly cationic polymers | Synthetic | <p>PGA</p>                                                                                                                               | Can be functionalized with proteins<br>Acts as a protective shield<br>Reduces non-specific interactions with cells and proteins in the bloodstream | Rapid clearance by the body<br>Limited stability in certain conditions                          |

Information adapted from *Chen et al.*<sup>60</sup>, *Piotrowski-Daspit et al.*<sup>61</sup>, *Molinar et al.*<sup>62</sup>, and *Smith et al.*<sup>63</sup>

## References for Supplementary Material

- 1 M. L. Varela, A. Comba, S. M. Faisal, A. Argento, A. Franson, M. N. Barissi, S. Sachdev, M. G. Castro and P. R. Lowenstein, **Gene Therapy for High Grade Glioma: The Clinical Experience**, *Expert Opin. Biol. Ther.*, 2023, **23**, 145–161.
- 2 H. Jiang, D. H. Shin, Y. Yi, X. Fan, J. Gumin, J. He, A. G. Gillard, F. F. Lang, C. Gomez-Manzano and J. Fueyo, **Adjuvant Therapy with Oncolytic Adenovirus Delta-24-RGDOX After Intratumoral Adoptive T-cell Therapy Promotes Antigen Spread to Sustain Systemic Antitumor Immunity**, *Cancer Res. Commun.*, 2023, **3**, 1118–1131.
- 3 R. E. Sobol, K. B. Menander, S. Chada, D. Wiederhold, B. Sellman, M. Talbott and J. J. Nemunaitis, **Analysis of Adenoviral p53 Gene Therapy Clinical Trials in Recurrent Head and Neck Squamous Cell Carcinoma**, *Front. Oncol.*, 2021, **11**, 645745.
- 4 A. Lee, **Nadofaragene Firadenovec: First Approval**, *Drugs*, 2023, **83**, 353–357.
- 5 B. L. Musher, B. G. Smaglo, W. Abidi, M. Othman, K. Patel, S. Jawaid, J. Jing, A. Brisco, J. Wenthe, E. Eriksson, G. J. Ullenhag, L. Sandin, B. Grilley, J. Leja-Jarblad, S. G. Hilsenbeck, M. K. Brenner, E. K. Rowinsky and A. S. I. Loskog, **A phase I/II study of LOAd703, a TMZ-CD40L/4-1BBL-armed oncolytic adenovirus, combined with nab-paclitaxel and gemcitabine in advanced pancreatic cancer.**, *J. Clin. Oncol.*, 2022, **40**, 4138–4138.
- 6 **LOAd703, an oncolytic virus-based immunostimulatory gene therapy, combined with chemotherapy for unresectable or metastatic pancreatic cancer (LOKON001): results from arm 1 of a non-randomised, single-centre, phase 1/2 study - The Lancet Oncology**, LOAd703, an oncolytic virus-based immunostimulatory gene therapy, combined with chemotherapy for unresectable or metastatic pancreatic cancer (LOKON001): results from arm 1 of a non-randomised, single-centre, phase 1/2 study - The Lancet Oncology, [https://www.thelancet.com/journals/lanonc/article/PIIS1470-2045\(24\)00079-2/abstract](https://www.thelancet.com/journals/lanonc/article/PIIS1470-2045(24)00079-2/abstract), (accessed 14 September 2024).
- 7 **Phase I trial of oncolytic adenovirus-mediated cytotoxic and interleukin-12 gene therapy for the treatment of metastatic pancreatic cancer - PMC**, Phase I trial of oncolytic adenovirus-mediated cytotoxic and interleukin-12 gene therapy for the treatment of metastatic pancreatic cancer - PMC, <https://www.ncbi.nlm.nih.gov.proxy.insermbiblio.inist.fr/pmc/articles/PMC7851493/>, (accessed 19 September 2024).
- 8 **Randomized controlled phase III trial of weekly paclitaxel ± ofranergene obadenovec (VB-111) for platinum-resistant ovarian cancer (OVAL Study/GOG 3018).** | **Journal of Clinical Oncology**, Randomized controlled phase III trial of weekly paclitaxel ± ofranergene obadenovec (VB-111) for platinum-resistant ovarian cancer (OVAL Study/GOG 3018). | *Journal of Clinical Oncology*, [https://ascopubs-org.proxy.insermbiblio.inist.fr/doi/10.1200/JCO.2023.41.16\\_suppl.5505](https://ascopubs-org.proxy.insermbiblio.inist.fr/doi/10.1200/JCO.2023.41.16_suppl.5505), (accessed 19 September 2024).
- 9 S. Makawita, J. M. Gibbs, D. R. McFadden, C. Porter, A. R. Shaw, C. Robertson, M. L. Woods, T. Wang, B. J. Grilley, H. E. Heslop, M. K. Brenner and M. Suzuki, **Binary oncolytic adenovirus in combination with HER2-specific autologous CAR VST for treatment of advanced HER2-positive solid tumors (VISTA).**, *J. Clin. Oncol.*, 2024, **42**, TPS2679–TPS2679.
- 10 **Final results of controlled IL-12 monotherapy in adults with grade III or IV gliomas.** | **Journal of Clinical Oncology**, Final results of controlled IL-12 monotherapy in adults with grade III or IV gliomas. | *Journal of Clinical Oncology*, [https://ascopubs-org.proxy.insermbiblio.inist.fr/doi/10.1200/JCO.2020.38.15\\_suppl.3040](https://ascopubs-org.proxy.insermbiblio.inist.fr/doi/10.1200/JCO.2020.38.15_suppl.3040), (accessed 19 September 2024).
- 11 N. Ji, D. Weng, C. Liu, Z. Gu, S. Chen, Y. Guo, Z. Fan, X. Wang, J. Chen, Y. Zhao, J. Zhou, J. Wang, D. Ma and N. Li, **Adenovirus-mediated delivery of herpes simplex virus thymidine kinase administration improves outcome of recurrent high-grade glioma**, *Oncotarget*, 2016, **7**, 4369–4378.
- 12 C. Aggarwal, A. R. Haas, S. Metzger, L. K. Aguilar, E. Aguilar-Cordova, A. G. Manzanera, E. W. Alley, T. L. Evans, R. B. Cohen, J. Bauml, C. J. Langer, S. Albelda and D. Stermann, **Phase I study of gene mediated cytotoxic immunotherapy (GMCI) for patients with malignant pleural effusion (MPE).**, *J. Clin. Oncol.*, 2016, **34**, 3081–3081.
- 13 L. A. Wheeler, A. G. Manzanera, S. D. Bell, R. Cavaliere, J. M. McGregor, J. C. Grecula, H. B. Newton, S. S. Lo, B. Badie, J. Portnow, B. S. Teh, T. W. Trask, D. S. Baskin, P. Z. New, L. K. Aguilar, E. Aguilar-Cordova and E. A. Chiocca, **Phase II multicenter study of gene-mediated cytotoxic immunotherapy as adjuvant to surgical resection for newly diagnosed malignant glioma**, *Neuro-Oncol.*, 2016, **18**, 1137–1145.

- 14 **Phase I study of gene-mediated cytotoxic immunotherapy with AdV-tk as adjuvant to surgery and radiation for pediatric malignant glioma and recurrent ependymoma - PubMed**, Phase I study of gene-mediated cytotoxic immunotherapy with AdV-tk as adjuvant to surgery and radiation for pediatric malignant glioma and recurrent ependymoma - PubMed, <https://pubmed.ncbi.nlm.nih.gov.proxy.insermbiblio.inist.fr/30883662/>, (accessed 19 September 2024).
- 15 **Candel Therapeutics Receives FDA Orphan Drug Designation for CAN-2409 for the Treatment of Pancreatic Cancer | Candel Therapeutics, Inc**, Candel Therapeutics Receives FDA Orphan Drug Designation for CAN-2409 for the Treatment of Pancreatic Cancer | Candel Therapeutics, Inc, <https://ir.candeltx.com/news-releases/news-release-details/candel-therapeutics-receives-fda-orphan-drug-designation-can/>, (accessed 19 September 2024).
- 16 I. Tsaour, M. P. Brandt, E. Juengel, C. Manceau and G. Ploussard, **Immunotherapy in prostate cancer: new horizon of hurdles and hopes**, *World J. Urol.*, 2021, **39**, 1387–1403.
- 17 **Overall survival after treatment with CAN-2409 plus valacyclovir in combination with continued ICI in patients with stage III/IV NSCLC with an inadequate response to ICI. | Journal of Clinical Oncology**, Overall survival after treatment with CAN-2409 plus valacyclovir in combination with continued ICI in patients with stage III/IV NSCLC with an inadequate response to ICI. | Journal of Clinical Oncology, [https://ascopubs.org/doi/10.1200/JCO.2024.42.16\\_suppl.8634](https://ascopubs.org/doi/10.1200/JCO.2024.42.16_suppl.8634), (accessed 22 July 2024).
- 18 D. Li, A. F. Shields, H. Mamdani, J. Leddon, P. M. Travis, C. A. Egelston, O. Colunga Flores, S. R. Hamilton, J. Austria, A. Seiz, S. Yavrom, J. C. H. Byon, P. P. Woodard and G. A. Wilkinson, **Oncolytic virus CF33-hNIS monotherapy for the treatment of gastrointestinal (GI) malignancies.**, *J. Clin. Oncol.*, 2024, **42**, 749–749.
- 19 Y. Yuan, C. Egelston, O. Colunga Flores, S. Chaurasiya, D. Lin, H. Chang, L. M. O. Chong, A. Seiz, M. Shah, W. H. Meisen, A. Tang, N. Martinez, W. Pickett, M. Murga, S. E. Yost, D. Stewart, J. Zhang, N. Ede, B. Modi, J. Kessler, J. Rand and Y. Fong, **CF33-hNIS-anti-PD-L1 oncolytic virus followed by trastuzumab-deruxtecan in a patient with metastatic triple negative breast cancer: a case study**, *Ther. Adv. Med. Oncol.*, 2023, **15**, 17588359231210675.
- 20 D. Li, A. Seiz, S. H. Fein, J. C. H. Byon, G. A. Wilkinson and P. P. Woodard, **Combination therapy with the oncolytic virus CF33-CD19 and blinatumomab for the treatment of advanced solid tumors.**, *J. Clin. Oncol.*, 2024, **42**, TPS2687–TPS2687.
- 21 B. B. Mendes, J. Coniot, A. Avital, D. Yao, X. Jiang, X. Zhou, N. Sharf-Pauker, Y. Xiao, O. Adir, H. Liang, J. Shi, A. Schroeder and J. Conde, **Nanodelivery of nucleic acids**, *Nat. Rev. Methods Primer*, 2022, **2**, 1–21.
- 22 D. V. Gladkikh, A. V. Sen Kova, I. V. Chernikov, T. O. Kabilova, N. A. Popova, V. P. Nikolin, E. V. Shmendel, M. A. Maslov, V. V. Vlassov, M. A. Zenkova and E. L. Chernolovskaya, **Folate-Equipped Cationic Liposomes Deliver Anti-MDR1-siRNA to the Tumor and Increase the Efficiency of Chemotherapy**, *Pharmaceutics*, 2021, **13**, 1252.
- 23 L. Wei, X.-Y. Guo, T. Yang, M.-Z. Yu, D.-W. Chen and J.-C. Wang, **Brain tumor-targeted therapy by systemic delivery of siRNA with Transferrin receptor-mediated core-shell nanoparticles**, *Int. J. Pharm.*, 2016, **510**, 394–405.
- 24 Y. Fidan, S. Muçaj, S. S. Timur and R. N. Gürsoy, **Recent advances in liposome-based targeted cancer therapy**, *J. Liposome Res.*, 2023, **0**, 1–19.
- 25 Y. S. Park, **Tumor-Directed Targeting of Liposomes**, *Biosci. Rep.*, 2002, **22**, 267–281.
- 26 C. Mamot, D. C. Drummond, C. O. Noble, V. Kallab, Z. Guo, K. Hong, D. B. Kirpotin and J. W. Park, **Epidermal Growth Factor Receptor-Targeted Immunoliposomes Significantly Enhance the Efficacy of Multiple Anticancer Drugs In vivo**, *Cancer Res.*, 2005, **65**, 11631–11638.
- 27 M. Breidenbach, D. T. Rein, M. Everts, J. N. Glasgow, M. Wang, M. J. Passineau, R. D. Alvarez, N. Korokhov and D. T. Curiel, **Mesothelin-mediated targeting of adenoviral vectors for ovarian cancer gene therapy**, *Gene Ther.*, 2005, **12**, 187–193.
- 28 N. Gholamian Dehkordi, F. Elahian, P. Khosravian and S. A. Mirzaei, **Intelligent TAT-coupled anti-HER2 immunoliposomes knock down MDR1 to produce chemosensitize phenotype of multidrug resistant carcinoma**, *J. Cell. Physiol.*, 2019, **234**, 20769–20778.
- 29 K. Ma, W. Li, G. Zhu, S. Sun, H. Chi, Y. Yin, H. Diao, X.-J. Xing, Z. Guo, L. Wang, W. Xu, C. Cui and J. Xu, **Functionalized PDA/DEX-PEI@HA nanoparticles combined with sleeping-beauty transposons for multistage targeted delivery of CRISPR/Cas9 gene**, *Biomed. Pharmacother. Biomedecine Pharmacother.*, 2021, **142**, 112061.
- 30 S. Yu, X. Bi, L. Yang, S. Wu, Y. Yu, B. Jiang, A. Zhang, K. Lan and S. Duan, **Co-Delivery of Paclitaxel and PLK1-Targeted siRNA Using Aptamer-Functionalized Cationic Liposome for Synergistic Anti-Breast Cancer Effects In Vivo**, *J. Biomed. Nanotechnol.*, 2019, **15**, 1135–1148.

- 31 T. Wang, L. M. Larcher, L. Ma and R. N. Veedu, **Systematic Screening of Commonly Used Commercial Transfection Reagents towards Efficient Transfection of Single-Stranded Oligonucleotides**, *Mol. J. Synth. Chem. Nat. Prod. Chem.*, 2018, **23**, 2564.
- 32 F. Cardarelli, L. Digiacoimo, C. Marchini, A. Amici, F. Salomone, G. Fiume, A. Rossetta, E. Gratton, D. Pozzi and G. Caracciolo, **The intracellular trafficking mechanism of Lipofectamine-based transfection reagents and its implication for gene delivery**, *Sci. Rep.*, 2016, **6**, 25879.
- 33 A. M. Jörgensen, R. Wibel and A. Bernkop-Schnürch, **Biodegradable Cationic and Ionizable Cationic Lipids: A Roadmap for Safer Pharmaceutical Excipients**, *Small*, 2023, **19**, 2206968.
- 34 Y. Funakoshi, Y. Iwao, S. Noguchi and S. Itai, **Effect of Alkyl Chain Length and Unsaturation of the Phospholipid on the Physicochemical Properties of Lipid Nanoparticles**, *Chem. Pharm. Bull. (Tokyo)*, 2015, **63**, 731–6.
- 35 Z. Wang, W. Li, Y. Jiang, J. Park, K. M. Gonzalez, X. Wu, Q.-Y. Zhang and J. Lu, **Cholesterol-modified sphingomyelin chimeric lipid bilayer for improved therapeutic delivery**, *Nat. Commun.*, 2024, **15**, 2073.
- 36 P. R. Cullis and P. L. Felgner, **The 60-year evolution of lipid nanoparticles for nucleic acid delivery**, *Nat. Rev. Drug Discov.*, 2024, 1–14.
- 37 A. Naing, G. Lopez-Berestein, S. Fu, A. M. Tsimberidou, S. Pant, S. A. Piha-Paul, F. Janku, D. S. Hong, S. Sulovic, X. Meng, A. A. Jazaeri, C. S. Ng, D. D. Karp, V. Subbiah, F. Meric-Bernstam, R. Mitra, S. Wu, A. Sood and R. L. Coleman, **EphA2 gene targeting using neutral liposomal small interfering RNA (EPHARNA) delivery: A phase I clinical trial.**, *J. Clin. Oncol.*, 2017, **35**, TPS2604–TPS2604.
- 38 D. Sarker, M. Sodergren, E. R. Plummer, B. Basu, T. Meyer, K.-W. Huang, T. R. J. Evans, D. Spalding, Y. T. Ma, D. H. Palmer, C. E. Chee, D. J. Pinato, V. Reebye, D. McVeigh, N. Raulf, J. Vasara, P. Andrikakou, R. Habib, D. Blakey and N. A. Habib, **Phase Ib dose escalation and cohort expansion study of the novel myeloid differentiating agent MTL-CEBPA in combination with sorafenib in patients with advanced hepatocellular carcinoma (HCC).**, *J. Clin. Oncol.*, 2020, **38**, 4601–4601.
- 39 M. Gagliardi and A. T. Ashizawa, **Making Sense of Antisense Oligonucleotide Therapeutics Targeting Bcl-2**, *Pharmaceutics*, 2022, **14**, 97.
- 40 **Adoptive Cell Transfer and Vaccines in Melanoma: The Horizon Comes Into View | American Society of Clinical Oncology Educational Book**, Adoptive Cell Transfer and Vaccines in Melanoma: The Horizon Comes Into View | American Society of Clinical Oncology Educational Book, [https://ascopubs-org.proxy.insermbiblio.inist.fr/doi/10.1200/EDBK\\_351114](https://ascopubs-org.proxy.insermbiblio.inist.fr/doi/10.1200/EDBK_351114), (accessed 20 September 2024).
- 41 A. J. Barbier, A. Y. Jiang, P. Zhang, R. Wooster and D. G. Anderson, **The clinical progress of mRNA vaccines and immunotherapies**, *Nat. Biotechnol.*, 2022, **40**, 840–854.
- 42 S. Kopetz, V. K. Morris, V. Alonso-Orduña, P. Garcia-Alfonso, M. Reboredo, A. Fernandez Montes, J. Maurel, D. Paez, A. C. Reinacher-Schick, T. Höhler, J. Carrasco, B. M. Galligan, L. Manning, L. Preußner, Ö. Tureci and U. Sahin, **A phase 2 multicenter, open-label, randomized, controlled trial in patients with stage II/III colorectal cancer who are ctDNA positive following resection to compare efficacy of autogene cevumeran versus watchful waiting.**, *J. Clin. Oncol.*, 2022, **40**, TPS3641–TPS3641.
- 43 A. J. Rosenberg, C. A. Perez, W. Guo, J. M. de Oliveira Novaes, K. F. O. da Silva Reis, P. W. McGarrah and K. A. R. Price, **Breaking Ground in Recurrent or Metastatic Head and Neck Squamous Cell Carcinoma: Novel Therapies Beyond PD-L1 Immunotherapy**, *Am. Soc. Clin. Oncol. Educ. Book*, 2024, **44**, e433330.
- 44 D. D. Rao, C. Jay, Z. Wang, X. Luo, P. Kumar, H. Eysenbach, M. Ghisoli, N. Senzer and J. Nemunaitis, **Preclinical Justification of pbi-shRNA EWS/FLI1 Lipoplex (LPX) Treatment for Ewing’s Sarcoma**, *Mol. Ther.*, 2016, **24**, 1412–1422.
- 45 C. Leung, M. Barve, M.-S. Wu, K. Pirolo, J. Strauss, W.-C. Liao, S.-H. Yang, R. Nunan, J. Adams, J. Harford and E. H. Chang, **A phase II trial combining tumor-targeting TP53 gene therapy with gemcitabine/nab-paclitaxel as a second-line treatment for metastatic pancreatic cancer.**, *J. Clin. Oncol.*, 2021, **39**, 4139–4139.
- 46 **Distant metastasis-free survival results from the randomized, phase 2 mRNA-4157-P201/KEYNOTE-942 trial. | Journal of Clinical Oncology**, Distant metastasis-free survival results from the randomized, phase 2 mRNA-4157-P201/KEYNOTE-942 trial. | Journal of Clinical Oncology, [https://ascopubs-org.proxy.insermbiblio.inist.fr/doi/10.1200/JCO.2023.41.17\\_suppl.LBA9503](https://ascopubs-org.proxy.insermbiblio.inist.fr/doi/10.1200/JCO.2023.41.17_suppl.LBA9503), (accessed 20 September 2024).
- 47 T. Carvalho, **Personalized anti-cancer vaccine combining mRNA and immunotherapy tested in melanoma trial**, *Nat. Med.*, 2023, **29**, 2379–2380.
- 48 J. S. Weber, J. J. Luke, M. S. Carlino, M. A. Khattak, R. S. Meehan, M. Brown, J. Zhang, C. Krepler, J. P. Duic and G. V. Long, **INTerpath-001: Pembrolizumab with V940 (mRNA-4157) versus pembrolizumab with placebo for adjuvant treatment of high-risk stage II-IV melanoma.**, *J. Clin. Oncol.*, 2024, **42**, TPS9616–TPS9616.

- 49 J. M. Lee, J. Spicer, S. Nair, A. Khattak, M. Brown, R. S. Meehan, N. M. Shariati, X. Deng, A. Samkari and J. E. Chaft, **The phase 3 INTERpath-002 study design: Individualized neoantigen therapy (INT) V940 (mRNA-4157) plus pembrolizumab vs placebo plus pembrolizumab for resected early-stage non–small-cell lung cancer (NSCLC).**, *J. Clin. Oncol.*, 2024, **42**, TPS8116–TPS8116.
- 50 M. R. Patel, T. M. Bauer, A. Jimeno, D. Wang, P. LoRusso, K. T. Do, S. M. Stemmer, C. Maurice-Dror, R. Geva, S. Zacharek, A. S. Laino, J. Sun, J. Frederick, H. Zhou, W. Randolph, P. S. Cohen, R. S. Meehan and R. J. Sullivan, **A phase I study of mRNA-2752, a lipid nanoparticle encapsulating mRNAs encoding human OX40L, IL-23, and IL-36γ, for intratumoral (ITu) injection alone and in combination with durvalumab.**, *J. Clin. Oncol.*, 2020, **38**, 3092–3092.
- 51 I. I. Rodriguez-Rivera, T.-H. Wu, R. Ciotti, W. Senapedis, K. Sullivan, J. Z. Gao, S. Palakurthi, T. McCauley and Y. Moore, **A phase 1/2 open-label study to evaluate the safety, tolerability, pharmacokinetics, pharmacodynamics, and preliminary antitumor activity of OTX-2002 as a single agent and in combination with standard of care in patients with hepatocellular carcinoma and other solid tumor types known for association with the MYC oncogene (MYCHELANGELO I).**, *J. Clin. Oncol.*, 2023, **41**, TPS627–TPS627.
- 52 J. D. Powderly, R. J. Sullivan, M. Gutierrez, A. Khattak, S. S. Thomas, A. Jimeno, S. Pascarella, L. Zhu, M. Morrissey, R. S. Meehan, F. Barlasakar, M. Brown and D. R. Spigel, **Phase 1/2 study of mRNA-4359 administered alone and in combination with immune checkpoint blockade in adult participants with advanced solid tumors.**, *J. Clin. Oncol.*, 2023, **41**, TPS2676–TPS2676.
- 53 T. A. Yap, K. P. Papadopoulos, E. Garralda, A. I. Spira, E. Calvo, O. Saavedra, J. L. Ramon-Patino, C. Stadler, S. Koseoglu, P. K. Chang, U. Ellinghaus, C. Lindemann, E.-M. Ewen, E. Zyto, A. Zamorski, J. L. Martinez, L. De Mattos-Arruda, I. Celik, Ö. Türeci and U. Sahin, **A phase I/II dose escalation trial with expansion cohorts to evaluate safety and preliminary efficacy of BNT142 in patients with prospectively confirmed claudin 6-positive solid tumors.**, *J. Clin. Oncol.*, 2023, **41**, TPS2669–TPS2669.
- 54 M. E. Raeber, D. Sahin, U. Karakus and O. Boyman, **A systematic review of interleukin-2-based immunotherapies in clinical trials for cancer and autoimmune diseases**, *eBioMedicine*.
- 55 G. Tabatabai, L. Von Baumgarten, M. J. Van Den Bent, M. C. Burger, P. Freres, M. Glas, P. Hau, U. Herrlinger, I. Mildenerger, B. Neyns, H. S. Schafer, C. Seidel, R. Galot, A. Wick, M. H. Falk, L. L. de Freitas Chama, P. Kelemen, S. D. Koch, P. Romer Roche, S. U. Gnad-Vogt, and CV-GBLM-001 Study Group, **Phase 1 dose-finding study to evaluate safety and tolerability of CVGBM in patients with newly diagnosed and surgically resected MGMT-unmethylated glioblastoma.**, *J. Clin. Oncol.*, 2024, **42**, TPS2095–TPS2095.
- 56 X. Peng, X. He, W. Zhang, H. Huang, X. Li, J. Chen, Y. Wei and X. Song, **Safety, tolerability, and immunogenicity of WGC-043 in subjects with EBV-positive cancers: Results from an investigator-initiated trial.**, *J. Clin. Oncol.*, 2024, **42**, 139–139.
- 57 **Personalized viral-based prime/boost immunotherapy targeting patient-specific or shared neoantigens: Immunogenicity, safety, and efficacy results from two ongoing phase I studies.** | *Journal of Clinical Oncology*, Personalized viral-based prime/boost immunotherapy targeting patient-specific or shared neoantigens: Immunogenicity, safety, and efficacy results from two ongoing phase I studies. | *Journal of Clinical Oncology*, [https://ascopubs-org.proxy.insermbiblio.inist.fr/doi/10.1200/JCO.2020.38.15\\_suppl.3137](https://ascopubs-org.proxy.insermbiblio.inist.fr/doi/10.1200/JCO.2020.38.15_suppl.3137), (accessed 20 September 2024).
- 58 J. R. Hecht, A. Shergill, M. G. Goldstein, B. Fang, M. T. Cho, H.-J. Lenz, L. D. Berim, P. E. Oberstein, R. A. Safyan, V. Sawhney, H. P. Soares, D. R. Spigel, A. I. Spira, A. R. Ferguson, B. Chauder and A. Starodub, **Phase 2/3, randomized, open-label study of an individualized neoantigen vaccine (self-amplifying mRNA and adenoviral vectors) plus immune checkpoint blockade as maintenance for patients with newly diagnosed metastatic colorectal cancer (GRANITE).**, *J. Clin. Oncol.*, 2022, **40**, TPS3635–TPS3635.
- 59 A. W. Tolcher, A. I. Spira, J. J. Nemunaitis, A. L. Vandross, H. Mamdani, Z. O'Brien, A. Huynh, Z. Albaugh, J. Gullbo and S. Zabludoff, **First-in-human dose-escalation study of NBF-006, a novel investigational siRNA targeting GSTP, in patients with non-small cell lung, pancreatic, or colorectal cancer.**, *J. Clin. Oncol.*, 2023, **41**, 3084–3084.
- 60 C.-K. Chen, P.-K. Huang, W.-C. Law, C.-H. Chu, N.-T. Chen and L.-W. Lo, **Biodegradable Polymers for Gene-Delivery Applications**, *Int. J. Nanomedicine*, 2020, **15**, 2131–2150.
- 61 A. S. Piotrowski-Daspit, A. C. Kauffman, L. G. Bracaglia and W. M. Saltzman, **Polymeric Vehicles for Nucleic Acid Delivery**, *Adv. Drug Deliv. Rev.*, 2020, **156**, 119–132.

- 62 C. Molinar, M. Tannous, D. Meloni, R. Cavalli and A. Scomparin, **Current Status and Trends in Nucleic Acids for Cancer Therapy: A Focus on Polysaccharide-Based Nanomedicines**, *Macromol. Biosci.*, 2023, **23**, 2300102.
- 63 T. T. Smith, S. B. Stephan, H. F. Moffett, L. E. McKnight, W. Ji, D. Reiman, E. Bonagofski, M. E. Wohlfahrt, S. P. S. Pillai and M. T. Stephan, **In situ programming of leukaemia-specific T cells using synthetic DNA nanocarriers**, *Nat. Nanotechnol.*, 2017, **12**, 813–820.
