# Supplementary material for: In vivo vectorization and delivery systems for gene therapies and RNA-based therapeutics in oncology
Source: Royal Society of Chemistry journal article supplement (doi:10.1039/d4nr05371k), 2025-01-01
Supplement: d4nr05371k2.xlsx [file d4nr05371k2.xlsx]

## Sheet: Clinical Trials GT - RNA based
Cancer type	Cancer	Payload/Strategy Gene Therapy	Details about gene	Delivery Route: Details	Delivery Route: intraT, IV …	Vector Details	Vector Used	Clinical stage	Primary Outcome Measure	Secondary Outcome Measure	Lead Sponsor	Sources	Dates	Details	Ref
Haematological:	Acute Myeloid Leukemia Acute Myeloid Leukemia Arising from Previous Myelodysplastic Syndrome Secondary Acute Myeloid Leukemia	ASO anti GRB-2	Growth Factor Receptor-Bound Protein 2, is an adaptor protein involved in cellular signal transduction. It plays a crucial role in linking activated cell surface receptors, such as receptor tyrosine kinases, to intracellular signaling pathways, influencing processes like cell growth, differentiation, and survival. The Philadelphia Chromosome is an unusual genetic trait found in 90-95% of patients…	(2/w for 28d)	IV	Liposome neutre DOPC	NON VIRAL	Phase I	Safety of BP1001	Optimal biologically active dose :defined as a 50% reduction in Grb-2 expression in circulating leukemia cells	Bio-Path Holdings, Inc.	Clinical trial + PUBLI Lancet Hemato + ASCO	2010-2020	NCT01159028 Clinical Trial of BP1001 (L-Grb-2 Antisense Oligonucleotide) in CML, AML, ALL & MDS
Haematological:	Acute Myeloid Leukemia Acute Myeloid Leukemia Arising from Previous Myelodysplastic Syndrome Secondary Acute Myeloid Leukemia	ASO anti GRB-2		BP1001 is given intravenously (IV) at 60 mg/m2 twice weekly	IV	Liposome neutre DOPC	NON VIRAL	Phase II	Assessment of efficacy in untreated AML subjects by bone marrow aspirate or biopsy	Assessment of safety of BP1001 in combination with Ventoclax plus decitabine	Bio-Path Holdings, Inc.	clinical Trial + ASCO	2016-2024	NCT02781883 :Clinical Trial of BP1001 in Combination With With Venetoclax Plus Decitabine in AML
Haematological:	Advanced Lymphoid Malignancies : Chronic Lymphocytic Leukemia/Small Lymphocytic Lymphoma Diffuse Large B-Cell Lymphoma Follicular Lymphoma Hodgkin Lymphoma Mantle Cell Lymphoma Marginal Zone Lymphoma Peripheral T-Cell Lymphoma Primary Cutaneous T-Cell Non-Hodgkin Lymphoma Transformed Non-Hodgkin Lymphoma Waldenstrom Macroglobulinemia	ASO anti Bcl-2 (oblimersen)	Bcl-2 : Bcl-2, or B-cell lymphoma 2, is a key regulator of apoptosis (programmed cell death) and a member of the Bcl-2 protein family. It functions to promote cell survival by inhibiting apoptosis and is often implicated in cancer when its expression is dysregulated, leading to uncontrolled cell growth and resistance to cell death	(20 / 40 mg/m^2 (2/w, 8 doses/28jours, Cycles repeated every 4 weeks)	IV	Liposome neutre DOPC	NON VIRAL	Phase I	Identify Dose Limiting Toxicity (DLT) of BP1002	Determine evidence of tumor response by bone marrow aspirate	Bio-Path Holdings, Inc.	Clinical trial + Publi CELL PRESS	2019-2023	NCT04072458 + The Challenges and Strategies of Antisense Oligonucleotide Drug Delivery TOP PUBLI
Haematological:	relapsed/refractory myelodysplastic syndromes (MDS) or acute myeloid leukemia (AML)	ASO anti STAT3 (danvatirsen)	STAT 3 : Signal Transducer and Activator of Transcription 3, is a transcription factor that plays a crucial role in transmitting signals from the cell membrane to the nucleus. Activated by various cytokines and growth factors, STAT3 regulates genes involved in cell growth, differentiation, and inflammation.		IV			Phase I				Clinical trial	2024	NCT05986240 : Danvatirsen Monotherapy Followed by Combination With Venetoclax in Relapsed/​Refractory MDS & AML
Haematological:	Refractory Diffuse Large B-Cell Lymphoma	ASO anti STAT3	STAT 3					Phase I				Clinical Trial + Publi	2018 - 2021	A Phase 1b Study to Evaluate the Safety and Efficacy of Durvalumab in Combination With Tremelimumab or Danvatirsen in Patients With Relapsed or Refractory Diffuse Large B-Cell Lymphoma
Haematological:	Lymphoma + Multiple myeloma	siRNA anti MYC	MYC MYC is a proto-oncogene that codes for a transcription factor protein involved in the regulation of cell growth and proliferation. Abnormal activation or overexpression of the MYC gene is frequently observed in various cancers and is associated with uncontrolled cell division			LNP	NON VIRAL	Phase I				Clinical Trial	2017	NCT02110563 Phase I, Multicenter, Dose Escalation Study of DCR-MYC in Patients With Solid Tumors, Multiple Myeloma, or Lymphoma
vocimagene amiretrorepvec (ne sortira pas, fusion tocagen-forte bioscience)	Cytosine Deaminase	Cytosine Deaminase	5FC->5FU		Retrovirus : TOCA 511 murine leukemia virus (MLV), a gammaretrovirus	VIRAL	Phase II/III : "unfortunately the TOCA 5 phase 3, randomized, multicenter clinocal trial evaluating Toca 5AA & Toca FC in patient with recurrent HGG undergoing resection FAILED to improve OS survival compared to SOC traitement. Results released in september 2019" Toca 511 & Toca FC in Recurrent High-Grade Glioma - CancerConnect	0				Clinical Trial	2015-2020	NCT02414165 : Toca 5: A Phase 2/3 Randomized, Open-Label Study of Toca 511, a Retroviral Replicating Vector, Combined with Toca FC versus Standard of Care in Patients Undergoing Planned Resection for Recurrent Glioblastoma (GBM) or Anaplastic Astrocytoma (AA) (NCT02414165)
Nervous system:	50 étude avec vecteurs viraux.. (current appoaches for glioma gene therapyand virotherpy) renseigner que les phases 2	CRISPR/Cas9 Editing PLK1	PLK1 : Polo-like kinase 1, is a protein kinase plays a crucial role in regulating the cell cycle. It is involved in processes such as mitosis, cell division, and maintenance of genomic stability. Due to its essential function in cell division. Therapeutic strategy : aiming to disrupt the uncontrolled growth of cancer cells			Editing PLK1glutathione-sensitive polymer shell incorporating a dual-action ligand	NON VIRAL	PréC in vitro				Science	2022	Blood-brain barrier–penetrating single CRISPR-Cas9 nanocapsules for effective and safe glioblastoma gene therapy
Nervous system:		CRISPR/Cas9 plasmids Editing MGMT	MGMT : O6-Methylguanine-DNA Methyltransferase (MGMT) is a DNA repair enzyme that counteracts the effects of DNA damage caused by alkylating agents. Its primary function is to remove alkyl groups from the O6 position of guanine, thus preventing the formation of DNA cross-links. In cancer, the expression levels of MGMT can impact the effectiveness of alkylating chemotherapy drugs, and reduced MGMT …			Lipid-polymer hybrid nanoparticles (LPHNs-cRGD)	NON VIRAL	PréC in vitro				International journal of nanomedicine	2023	Gene Therapy for Drug-Resistant Glioblastoma via Lipid-Polymer Hybrid Nanoparticles Combined with Focused Ultrasound
Nervous system:		Chimeric gene encoding TNF-R1 et Fas-R / promotor PPE-1 sensible à l'hypoxie.	TNF-R1 - Fas-R : Both TNFαR and FasR are integral components of the immune system and are involved in maintaining cellular homeostasis through the regulation of apoptosis and inflammation.			AdV5	VIRAL	Phase II				Clinical Trial	2023	NCT04406272 : VB-111 in Surgically Accessible Recurrent/​Progressive GBM
Nervous system:		miRNA 603 (GIGA BIEN) Patient-Derived Glioblastoma Stem-Like Cells	miRNA 603
Nervous system:	Glioblastoma	Cytosine Deaminase	5FC->5FU	3 weekly IV infusions at Days 1, 8, and 15. Following the 1st and 2nd infusion of TG6002 on Day 1 and 8, patients will be given oral 5-FC for 3 days starting on Day 5 and 12 and ending on Day 7 and 14, respectively. Following the 3rd infusion of TG6002 on Day 15, patients will be given oral 5-FC for 21 days starting on Day 19 and ending on Day 39 (end of treatment)The starting dose of 1 x 105 pfu	IV	Vaccinia Virus	VIRAL	Phase I/II	NA	NA	Assistance Publique - Hôpitaux de Paris - Transgene	Clinical trial	2017-2021	NCT03294486 :Safety and Efficacy of the ONCOlytic VIRus Armed for Local Chemotherapy, TG6002/​5-FC, in Recurrent Glioblastoma Patients (ONCOVIRAC)
Nervous system:	Recurrent Glioblastome Multiform	HSV-Tk		The gene therapy investigational product, HSV-tk will be injected during the surgery. Within 24 hours valacyclovir will be given for 14 days. Radiotherapy will be administered over 10 sessions (over 2 weeks) starting within 9 days of surgery. Standard of care/routine chemotherapy will be started concurrent or after completion of the radiotherapy dependent on patient status based on best clinical …	N/A	AdV	VIRAL	Phase I/II	Survival in months from Study drug administration (Day 0):The overall survival in months of recurrent GBM patients drug administration up to five years	Progression Free Survival assessments will be done every 6-8 weeks for 1st year thereafter every 12-14 weeks until disease progression or death : Patients will have MRI or CT every 6-8 weeks for the first year post surgery. Thereafter patient will have MRI or CT every 12-14 weeks until completion of the protocol study specific treatment. Progression free survival will be assessed by RANO response…	The Methodist Hospital Research Institute	Clinical Trial	2017-2023	NCT03596086 : HSV-tk + Valacyclovir + SBRT + Chemotherapy for Recurrent GBM
	Glioma	HSV-Tk + Flt3L	Flt3L :a cytokine known to cause proliferation of dendritic cells, should cause the migration of dendritic cells to the peritumoral brain and remaining tumor.	consists of surgical debulking of the tumor mass followed by the administration of the viral vectors into the brain tissue surrounding the tumor cavity	Intratumoral or tumor Bed	AdV	VIRAL	Phase I				Clinical trial	2014-2021	NCT01811992 : Combined Cytotoxic and Immune-Stimulatory Therapy for Glioma
Nervous system:	Newly diag glioblastoma multiforme ou anaplasic astrocytoma	HSV-Tk				AdV	VIRAL	Phase I/II			The Methodist Hospital Research Institute	Clinical Trial	2018-2023	NCT03603405 : HSV-tk and XRT and Chemotherapy for Newly Diagnosed GBM
Nervous system:	Recurrent gGBM	Oncolytic	DNX-2440	stereotactic biopsy will be performed. In the same surgery, the experimental agent will be injected also by stereotactic system, in a different part of the lesion, in a region considered viable tumor, using a cannula especially designed for virus injection.	Intratumoral	AdV	VIRAL	Phase I			Clinica Universidad de Navarra, Universidad de Navarra	Clinical trial	2018-2023	NCT03714334 :DNX-2440 Oncolytic Adenovirus for Recurrent Glioblastoma
Nervous system:	Neoplasms, Brain Glioblastoma Multiforme Glioblastoma of Cerebellum Neoplasms	Oncolytic	HSV G207	NA	NA	HSV 207	VIRAL	Phase I	The primary goal is to determine safety	obtain preliminary information on the effectiveness of and immune response to G207 - 3 + 3 design will be used with four patient cohorts	University of Alabama at Birmingham	Clinical trial	2019-2026	NCT03911388 :HSV G207 in Children With Recurrent or Refractory Cerebellar Brain Tumors
Nervous system:
Nervous system:		HSV-Tk				Poly(ethylene glycol)–Poly(beta-amino ester)-Based Nanoparticles	NON VIRAL	PréC in vivo				ACS Biomaterials	2020	Poly(ethylene glycol)−Poly(beta-amino ester)-Based Nanoparticles for Suicide Gene Therapy Enhance Brain Penetration and Extend Survival in a Preclinical Human Glioblastoma Orthotopic Xenograft Model
Nervous system:	Vectors for Glioblastoma Gene Therapy: Viral & Non-Viral Delivery Strategies	WT TP53	WT TP53 : p53, encoded by the TP53 gene, is a vital tumor suppressor that guards the genome by regulating cell cycle progression and initiating cellular responses to DNA damage. Apoptose			SGT 53 + anti PD-1	NON VIRAL	PréC in vivo				International Journal of Cancer	2019	A tumor-targeting nanomedicine carrying the p53 gene crosses the blood–brain barrier and enhances anti-PD-1 immunotherapy in mouse models of glioblastoma
Nervous system:		WT TP53	WT TP53			SGT 53 (DOTAP/DOPE)	NON VIRAL	Phase II				clinical trial		NCT02340156 A CHERCHER
Nervous system:		HSV-Tk				AdV	VIRAL	Phase I				Clinical Trial	2015-2021	aglatimagene besadenovec NCT00634231 + Phase I study of gene-mediated cytotoxic immunotherapy with AdV-tk as adjuvant to surgery and radiation for pediatric malignant glioma and recurrent ependymoma, Gene-mediated cytotoxic immunotherapy=GMCI, HSV-tk converts valacyclovir to antiviral drug acyclovirGMCI induces T-cell dependent tumor immunity and synergizes with radiotherapy. Clinical trials in a…
Nervous system:		HSV-Tk				AdV	VIRAL	Phase Iia				Clinical Trial		NCT00589875
Nervous system:	Recurrent GBM or gliosarcoma	Oncolytic/IFN-gamma		Eligible subjects will receive a single intratumoral injection of DNX-2401 into a recurrent glioblastoma or gliosarcoma brain tumor using the Alcyone MEMS Cannula (AMC™) System (cannula).	Intratumoral	AdV	VIRAL	Phase I			DNAtrix, Inc.	Clinical Trial	2014-2018	NCT02197169 :DNX-2401 With Interferon Gamma (IFN-γ) for Recurrent Glioblastoma or Gliosarcoma Brain Tumor
Nervous system:	Recurrent High-Grade Glioma, IDH-mutant astrocytoma grade 4, gliosarcoma, or wild-type IDH-1 anaplastic astrocytoma.	Oncolytic		intra-arterial injection (i.e., transfemoral endovascular intracranial injection)	Intra-Arterial Injection	Bone marrow hMSC	VIRAL	Phase I			DNAtrix, Inc.	Clinical Trial	2019-2023	NCT03896568 :MSC-DNX-2401 in Treating Patients With Recurrent High-Grade Glioma
Nervous system:	Newly DiagnosedMalignant Glioma	Oncolytic					VIRAL	Phase I			Northwestern University	Clinical trial + The lancet	2021	NCT03072134 :Neural stem cell delivery of an oncolytic adenovirus in newly diagnosed malignant glioma: a first-in-human, phase 1, dose-escalation trial
Nervous system:	Recurrent or Progressive Glioblastoma or Grade III Malignant Glioma	IL12	IL12 : Interleukin-12 (IL-12) is a cytokine produced by immune cells that plays a crucial role in enhancing the immune response, particularly by promoting the activation of T cells and natural killer cells. Its ability to stimulate the production of interferon-gamma makes IL-12 a key mediator in the immune system's defense against infections and cancer.	patients will be stratified to one of two groups, according to clinical indication for tumor resection. Patients who are scheduled for a standard of care craniotomy and tumor resection will receive one dose of veledimex before the resection procedure. Ad-RTS-hIL-12 will be administered by free-hand injection. Patients will continue on oral veledimex for 14 days. Patients not scheduled for tumor r…	Intratumoral	AdV-RTS ?	VIRAL	Phase I	to evaluate the safety and tolerability of a single tumor injection of Ad-RTS-hIL-12 given with oral veledimex.		Alaunos Therapeutics	clinical trial + PUBLI OUF(SCIENCE TRANSLATIONAL MEDICINE)	2019-01-01	NCT02026271 + Regulatable interleukin-12 gene therapy in patients with recurrent high-grade glioma + veledimex (VDX) = activateur oral de l'IL12, Therapeutic System ] was developed to locally control production of IL-12 in the tumor microenvironment. In this system, transcription of the IL-12 transgene occurs only in the presence of the activator ligand, veledimex (VDX)
Nervous system:		T7-LPC/siRNA(EGFR)	EGFR : EGFR (Epidermal Growth Factor Receptor) is a cell surface receptor involved in regulating cell growth. Dysregulation of EGFR is associated with cancer, and inhibitors targeting this receptor are used in cancer therapy.			NPs( protamine/chondroitin sulfate /cationic liposomes followed by T7 peptide modification)	NON VIRAL	PréC (in vitro + in vivo mice)				International Journal of Pharmaceutics	2016-01-01	Brain tumor-targeted therapy by systemic delivery of siRNA with Transferrin receptor-mediated core-shell nanoparticles
Nervous system:		miRNA 603 (GIGA BIEN) Patient-Derived Glioblastoma Stem-Like Cells	miRNA 603			DPPC, cholesterol, DPPE-PEG750, and PEI + R_b is a fibronectin-mimetic peptide	NON VIRAL	PréC in vitro				Pharmaceutics	2021	Targeted Liposomes Encapsulating miR-603 Complexes Enhance Radiation Sensitivity of Patient-Derived Glioblastoma Stem-Like Cells(miRNA 603 (miR-603) is a master regulatory miRNA that suppresses glioblastoma radiation resistance
Nervous system:	Recurrent GBM / Gliosarcoma / anaplasic astrocytoma	Oncolytic		Patients underwent inoculation of G207 into their tumors, followed two to five days later by resection of the tumor and reinoculation of G207 into the tumor cavity	Intra tumoral	HSV-1	VIRAL	Phase I	NA	NA	University of Alabama at Birmingham	Clinical trial	2019-2024	NCT03657576 : Trial of C134 in Patients With Recurrent GBM (C134-HSV-1)
Nervous system:	Recurrent Glioblastoma
Nervous system:		MB 108 (C134 Oncolytic virus NCT03657576) + MB-101 (IL13Ralpha2 CAR-T cell therapy NCT02208362)					VIRAL + Cell Therapy	Preclinical (in vivo) + phase I for each of the two therapies				Mustang bio site	2022	Mustang Bio Announces a Phase 1 Clinical Trial Combining MB-101 (IL13Rα2‐targeted CAR T cell therapy) and MB-108 (C134 oncolytic virus) for the Treatment of Glioblastoma / Mustang Bio Announces FDA Acceptance of IND Application for MB-109, a Novel Combination of MB-101 (IL13Rα2‐targeted CAR-T cell therapy) and MB-108 (HSV-1 oncolytic virus), for the Treatment of Recurrent Glioblastoma and High-Gr…
	Newly diag glioblastoma multiforme ou anaplasic astrocytoma	Oncolytic		after neurosurgical resection, NSC-CRAd-S-pk7 injected into the walls of the resection cavity )	Intratumoral	Neural stem cells	CELLULAR	Phase I	Primary endpoints: safety and tolerability	secondary endpoints: survival outcomes and correlation with immune response	Maciej Lesniak, Northwestern University (Responsible Party)	Clinical trial	2017-2019	NCT03072134 : Cells as vectors for oncolytic Ad5 for in vivo gene therapy for brain tumors
Nervous system:	Astrocytoma
Nervous system:	Neuroblastoma
Nervous system:	Retinoblastoma
Breast Cancer	Breast													"Gene therapy : A promising approach for breast cancer"
Breast Cancer	Brest Cancer	siRNA anti PLK1	PLK1:			DOPE, sphingomyelin (SM), cholesterol, DSPE-PEG2000 , Didecyldimethylammonium bromide (DDAB) + AS1411 Aptamer	NON VIRAL	PréC in vivo				J biomed nanotechnology	2019	Co-Delivery of Paclitaxel and PLK1-Targeted siRNA Using Aptamer-Functionalized Cationic Liposome for Synergistic Anti-Breast Cancer Effects In Vivo
Breast Cancer	TNBC/HER2- ER+	GM-CSF				HSV-1	VIRAL	Phase I	To explore the safety of talimogene laherparepvec in combination with nivolumab and ipilimumab in this population assessed by the frequency and severity of adverse events (AEs) using Common Terminology Criteria for Adverse Events (CTCAE) version (v)4.0 toxicity criteria	Assess tumor response of talimogene laherparepvec in combination with nivolumab and ipilimumab comparing to no treatment, in subjects with localized estrogen receptor (ER) positive and triple negative infiltrating ductal breast cancer. II. Descriptively analyze the evidence of tumor necrosis and inflammatory infiltration on histopathological examination and immuno-oncological findings in tumor an…	Jonsson Comprehensive Cancer Center	Clinical trial	2019-2023	NCT04185311 :Ipilimumab, Nivolumab, and Talimogene Laherparepvec Before Surgery in Treating Participants With Localized, Triple-Negative or Estrogen Receptor Positive, HER2 Negative Breast Cancer-deleted
Breast Cancer	Early Breast Cancer	GM-CSF			Intratumoral	HSV-1	VIRAL	Phase I	To evaluate the efficacy (as measured by residual cancer burden [RCB] class 0/1 rate) of Talimogene Laherparepvec with Atezolizumab given to subjects with operable early breast cancer who present residual disease after neoadjuvant chemotherapy (NAC).	Comparing the expression of a gene signature tracking activated CD8 T-cells at surgery after treatment with T-VEC and atezolizumab with residual disease after NAC	Solti BC research group, Amgen, Roche pharma AG	Clinical Trial	2019-2023	NCT03802604 Combination of Talimogene Laherparepvec With Atezolizumab in Early Breast Cancer (PROMETEO)
?	HER 2+	RANTES and IL-15	RANTES + IL15			AdV onco + CAR-T anti HER 2	VIRAL	Phase I				Clinical Trial	2023	Binary Oncolytic Adenovirus in Combination With HER2-Specific Autologous CAR VST, Advanced HER2 Positive Solid Tumors (VISTA)
Breast Cancer	mTNBC	Oncolytic / expressing hNIS/Anti-PD-L1 Antibody			intratumorally (IT)	orthopoxvirus	VIRAL	Phase I	To determine the safety and tolerability of a novel chimeric oncolytic orthopoxvirus, oncolytic virus CF33-expressing hNIS/Anti-PD-L1 antibody (CF33-hNIS-antiPDL1), by the evaluation of toxicities including: type, frequency, severity, attribution, time course, reversibility and duration according to Common Terminology Criteria for Adverse Events (CTCAE) 5.0 criteria.	To determine the optimal biologic dose (OBD) (defined as a safe dose that induces an immune response in tumors [increase checkpoint target PD-L1 by at least 5% and/or increase T cell infiltration by at least 10%]) and the recommended phase II dose (RP2D) for future expansion trial. II. To determine tumor response rates by Response Evaluation Criteria in Solid Tumors (RECIST) version (v)1.1 (prima…	Imugene Limited	Clinical trial	2021-2024	NCT05081492 : CF33-hNIS-antiPDL1 for the Treatment of Metastatic Triple Negative Breast Cancer
Breast Cancer	Tumor expressing at least one of the vaccine targeted antigens Melanoma-associated antigen (MAGE)-A1, -A2,	cancer/testis antigen (CTA) & CD80, CD40 ligand (CD40L, CD154)		?	?	Vaccinia Virus	VIRAL	Phase I / II	evaluating safety, in adjuvant setting	immunological and clinical efficacy	University Hospital, Basel, Switzerland	Clinical trial	2020	NCT03110445 : Cancer/​Testis Antigen Immunotherapy Phase I Study With 740-CTA Vaccinia Virus (rVV-740CTA)
Breast Cancer	TNBC	mRNA encoding neoantigen			IV	LNP	NON VIRAL	Phase I			BioNTech SE	Clinical Trial	2016-2023
Breast Cancer	TNBC	miRNA Slug	Slug : also known as Snail2, is a transcription factor and a member of the Snail family of zinc finger proteins. It plays a critical role in the regulation of epithelial-mesenchymal transition (EMT), a process involved in embryonic development, tissue regeneration, and cancer progression. In cancer, Slug is often associated with the promotion of invasiveness and metastasis by facilitating the tra…			DSPE-PEG2000-tLyp-1 peptide-modified functional liposomes.	NON VIRAL	PréC (in vitro + in vivo mice)				International Journal of Nanomedicine	2019	Nanosized functional miRNA liposomes and application in the treatment of TNBC by silencing Slug gene
Breast Cancer	recurrent/refractory metastatic breast cancer	GMCSF-Lact	Lact = Lactaparin : act as a tumor suppressor in mouse hepatoma as well as in MDA-MB-231 human adenocarcinoma cells grafted into SCID mice.		intratumorally (IT)	Vaccinia Virus	VIRAL	Phase I	evaluating safety, tolerability and pharmacokinetic parameters of the drug based on double recombinant vaccinia virus VV-GMCSF-Lact,		Oncostar" LLC		2022	NCT05376527 : Open Multi-cohort Study of the First Phase of Safety of a Drug Based on Double Recombinant Vaccinia Virus VV-GMCSF-Lact
Cancer Gynaecological:	nude mouse/breast cancer	pcDNA3.1-CSF1-(endostatin gene, anti angio)				POPC, DSPE-PEG2000 -Mal, DSPE-mPEG2000 , and DDAB+ Anti-CD105 mAb	NON VIRAL	PréC (in vitro + in vivo mice)				Journal of Experimental & Clinical cancer research	2018	Efficient targeted tumor imaging and secreted endostatin gene delivery by antiCD105 immunoliposomes
Cancer Gynaecological:	Ovary	Fas-chimera (Fas-c) transgene under the control of a modified murine pre-proendothelin-1 (PPE-1) promoter	potential anti-angiogenic activity			Ad-5, El-deleted, with potential anti-angiogenic activity	VIRAL	Phase III	OS	PFS : by RECIST	Vascular Biogenics Ltd. operating as VBL Therapeutics	Clinical Trial	2017-2022	NCT03398655 :A Study of VB-111 With Paclitaxel vs Paclitaxel for Treatment of Recurrent Platinum-Resistant Ovarian Cancer
Cancer Gynaecological:	Low-grade Cervical HPV Lesions	HPV		?	?	ChAdOx1 / Modified Vaccinia Ankara	VIRAL	Phase I / II	Safety, efficacy and immunogenicity		Barinthus Biotherapeutics	Clinical Trial	2021	NCT04607850 : Prime-boost Vaccine Study in Women With Low-grade Cervical HPV Lesions
Cancer Gynaecological:	Cervix	ZFNs cleave HPV16/18 E7 DNA				?	?	phase I				clinical trial	2017	NCT02800369 : Les agents nucléases à doigts de zinc (ZFN), appelés ZFN-603 et ZFN-758, qui peuvent cliver spécifiquement l'oncogène HPV16 et HPV18 E7. La perturbation médiée par ZFN de l'ADN de HPV16 et HPV18 E7 a directement diminué l'expression de E7, induit une apoptose spécifique de type dans les cellules positives pour HPV16 et HPV18 et a inhibé la croissance cellulaire
Cancer Gynaecological:	HPV-related Cervical Intraepithelial Neoplasia	CRISPR/Cas9-HPV E6/E7	E6 - E7 : Previous evidences showed that using designated TALEN and CRISPR/Cas9 as genome editing tool could produce disruption of HPV16 and HPV18 E6/E7 DNA, significantly decreasing the expression of E6/E7, inducing cell apoptosis and inhibiting cell lines growth			AAV	VIRAL	phase I				clinical trial	2017	NCT03057912 : A Safety and Efficacy Study of TALEN and CRISPR/​Cas9 in the Treatment of HPV-related Cervical Intraepithelial NeoplasiaⅠ
Cancer Gynaecological:	Vulva
Gastrointestinal	ColoR	Patient-Specific Neoantigen	/		Intramuscular	ChAdV / LNP	VIRAL + NON VIRAL	Phase II/III	to characterize the clinical activity of maintenance therapy with GRT-C901/GRT-R902 (patient-specific vaccines) in combination with checkpoint inhibitors in addition to fluoropyrimidine/bevacizumab versus a fluoropyrimidine/bevacizumab alone as assessed by molecular response which is based on changes in circulating tumor (ct)DNA	The primary objective of the Phase 3 portion is to demonstrate clinical efficacy of the regimen as assessed by progression-free survival.	Gritstone bio, Inc.	Clinical Trial	2022	NCT05141721 : A Study of a Patient-Specific Neoantigen Vaccine in Combination With Immune Checkpoint Blockade for Patients With Metastatic Colorectal Cancer
Gastrointestinal		TRAIL	Tumor necrosis factor-related apoptosis-inducing ligand : protein that induces apoptosis in cancer cells while sparing normal cells. Ability to selectively target and kill cancer cells through apoptosis-inducing receptors			PAMAM (G4 and G5) dendrimers modified by the alkyl-carboxylate chain, PEG, and cholesteryl chloroformate	NON VIRAL	PréC (in vitro + in vivo mice)				taylor et francis ?	2021	Co-delivery of doxorubicin and TRAIL plasmid by modified PAMAM dendrimer in colon cancer cells, in vitro and in vivo evaluation
Gastrointestinal		PEDF pigment epithelium-derived factor	PEDF			Polymer	NON VIRAL	PréC (in vitro + in vivo mice)				Biomedicine & pharmacotherapy	2017	Polymer-based nanoparticles for chemo/gene-therapy: Evaluation its therapeutic efficacy and toxicity against colorectal carcinoma
Gastrointestinal	Pancreatic Cancer	CD + IL 12			Intra tumoral	AdV 5 : Ad5-yCD/mutTKSR39rep-hIL12	VIRAL	Phase I	toxicity at day 21 : intensity, persistence, and biodistribution of HSV-1 TK gene expression	association of immunological measurements (i.e., cytokine levels, NK cytolytic activity) with toxicity and clinical outcome.	Henry Ford Health System	Clinical trial	2017	NCT03281382 : Phase 1 Trial of Interleukin 12 Gene Therapy for Metastatic Pancreatic Cancer / Phase I trial of oncolytic adenovirus-mediated cytotoxic and interleukin-12 gene therapy for the treatment of metastatic pancreatic cancer
Gastrointestinal	Liver (métastases) :les metastases du foie sont la première cause de CRC-related death	DNAse I	DNAse I :DNAse I is an enzyme that catalyzes the cleavage of phosphodiester linkages in the DNA backbone, resulting in the generation of smaller DNA fragments. This enzyme specifically cleaves double-stranded DNA			AAV	VIRAL	PréC in vivo				Molecular Oncology	2020	AAV-mediated gene transfer of DNase I in the liver of mice with colorectal cancer reduces liver metastasis and restores local innate and adaptive immune response, Neutrophil extracellular traps (NETs) play important roles in CRC progression. Deoxyribonuclease I (DNase I) has been shown to alter NET function by cleaving DNA strands comprising the NET backbone. More- over, DNase I displays high ant…
Gastrointestinal	Advanced HCC	HSV-Tk		The first ADV-TK dose was administered during the operation; 1.0×10(12) viral particles of ADV-TK in 100 mL of 0.9% saline were injected into peritoneum tissues around the liver. The second and third ADV-TK dose was administered 60 days and 90 days after LT; 1.0×10(12) viral particles of ADV-TK in 100 mL of 0.9% saline were injected into the celiac artery (60 mL) and the superior mesenteric arter…	into peritoneum tissues around the liver, into the celiac artery, superior mesenteric artery via femoral-artery puncture.	AdV	VIRAL	Phase III				Clinical trial	2017-2019	NCT03313596 : Multicenter RCT of ADV-TK Gene Therapy Improving the Outcome of Liver Transplantation for Advanced HCC / Aglatimagene besadenovec by Candel Therapeutics for Pancreatic Ductal Adenocarcinoma: Likelihood of Approval
Gastrointestinal	Post‐hepatitis liver cancer
Gastrointestinal	Pancreatic Cancer	siRNA anti PKN3	PKN3 : Protein Kinase N3, is a member of the protein kinase C-related kinase (PRK) family. It is a serine/threonine kinase involved in various cellular processes, including cell proliferation, survival, and cytoskeletal organization. PKN3 has been implicated in cancer, where its dysregulation may contribute to aberrant cell growth and metastasis. Researchers are exploring its potential as a thera…			LNP Atu027 : AtuFECT01-DPhyPE/DSPE-PEG-200	NON VIRAL	Phase I				Clinical trial + Publi	2013 + 2020	NCT01808638 Atu027 Plus Gemcitabine in Advanced or Metastatic Pancreatic Cancer (Atu027-I-02) (Atu027-I-02) + Safety, Efficacy and Pharcacokinetics of Targeted Therapy with The Liposomal RNA Interference Therapeutic Atu027 Combined with Gemcitabine in Patients with Pancreatic Adenocarcinoma. A Randomized Phase Ib/IIa Study
Gastrointestinal	Pancreatic Cancer
Gastrointestinal	Metastatic Pancreatic adK (PAC)	WT TP53	WT TP53		IV	SGT 53 (DOTAP/DOPE)	NON VIRAL	Phase II				Clinical trial	2022	NCT02340117 : A phase II trial combining tumor-targeting TP53 gene therapy with gemcitabine/nab-paclitaxel as a second-line treatment for metastatic pancreatic cancer.
Gastrointestinal		2 transgenes : 4-1BBL et TMZ CD40L	4-BBL			AdV5/35	VIRAL	Phase I/II				Clinical Trial	2015-2022	NCT02705196 : LOAd703 Oncolytic Virus Therapy for Pancreatic Cancer
Gastrointestinal	PDAC
Gastrointestinal		siRNA anti KRASG12D	KRAS : Kirsten rat sarcoma viral oncogene homolog, is a proto-oncogene that codes for a protein involved in cell signaling pathways. It is a member of the RAS gene family and plays a crucial role in regulating cell growth and differentiation. Mutations in the K-RAS gene are frequently found in various cancers, particularly colorectal cancer, lung cancer, and pancreatic cancer.			Matrix polymer : PLGA polymer matrix	NON VIRAL	Phase I				Clinical trial	2019	NCT01188785 : Phase I - Escalating Dose Study of siG12D LODER (Local Drug EluteR) in Patients With Locally Advanced Adenocarcinoma of the Pancreas, and a Single Dose Study of siG12D LODER (Local Drug EluteR) in Patients With Non-operable Adenocarcinoma of the Pancreas
Gastrointestinal		siRNA anti KRASG12D	KRAS G12D			Matrix polymer : PLGA polymer matrix	NON VIRAL	Phase II				Clinical trial	2021	NCT01676259: A Phase 2 Study of siG12D LODER in Combination With Chemotherapy in Patients With Locally Advanced Pancreatic Cancer (PROTACT) + Polymeric nanoparticles for RNA delivery
Gastrointestinal	metastatic pancreatic ductal adenocarcinoma	siRNA anti KRASG12D	KRAS G12D			mesenchymal stromal cells-derived exosomes	NON VIRAL	Phase I	(MTD) (DLT)	pharmacokinetic, overall response rate, disease control rate, median progression-free survival, median overall survival (OS)	M.D. Anderson Cancer Center	Clinical trial	2021	NCT03608631 : iExosomes in Treating Participants With Metastatic Pancreas Cancer With KrasG12D Mutation
Gastrointestinal		Encoding dominant-negative mutant construct (dnG1) of human cyclin G1 (CCNG1	dnG1 - human cyclin G1			MLV-based amphotropic retrovector	VIRAL	Phase I/II				publi	2018	A Phase I-II Study Using Rexin-G Tumor-Targeted Retrovector Encoding a Dominant-Negative Cyclin G1 Inhibitor for Advanced Pancreatic Cancer. displaying a cryptic collagen-binding motif on its gp70 surface membrane for targeting abnormal Signature (SIG) proteins in the tumor microenvironment (TME).Rexin-G is a replication-incompetent retroviral vector displaying a cryptic SIG-binding peptide for t…
Gastrointestinal	Gallbladder
Gastrointestinal	high grade (HG) non-muscle invasive bladder cancer (NMIBC)	Cytosine Deaminase	5FC->5FU			Retrovirus : TOCA 511 murine leukemia virus (MLV), a gammaretrovirus	VIRAL	Phase I				Clinical trial	2019-2027	NCT04089163 A Study of Toca 511 & Toca FC in Patients With Recurrent High Grade Non-Muscle Invasive Bladder Cancer (Toca 8)
Gastrointestinal	Hepatocellular carcinoma	siRNA anti PLK1	PLK1			LNP	NON VIRAL	Phase I/II				Clinical trial + Publi	2017-2019	NCT02191878 : Safety, Pharmacokinetics and Preliminary Anti-Tumor Activity of Intravenous TKM-080301 in Subjects With Advanced Hepatocellular Carcinoma + An Open-Label, Multicenter, Phase I, Dose Escalation Study with Phase II Expansion Cohort to Determine the Safety, Pharmacokinetics, and Preliminary Antitumor Activity of Intravenous TKM-080301 in Subjects with Advanced Hepatocellular Carcinoma
Genitourinary	Genitourinary	SGT94	RB1 retinoblastoma gene, codes for the pRB protein, a crucial tumor suppressor involved in regulating the cell cycle by inhibiting the transition from G1 to S phase. Mutations in RB1, whether inherited or sporadic, can disrupt this regulation, leading to uncontrolled cell division.			plasmid encoding RB94, a truncated form of the RB gene	NON VIRAL	Phase I				The American Society of Gene & Cell Therapy	2016	tumortargeted liposomal nanodelivery complex (SGT-94) carrying a plasmid encoding RB94, a truncated form of the RB gene. In preclinical studies, RB94 showed marked cytotoxicity against tumor
	Prostate	NIS (?)			transperineal injection	Ad5CMV	VIRAL	Phase I	To determine the safety and tolerance of Ad5CMV-NIS administered intraprostatically followed by radioiodine treatment in patients with locally recurrent adenocarcinoma of the prostate following external beam radiotherapy. To determine the maximum tolerated dose of Ad5CMV-NIS in these patients.	To evaluate the PSA response rates, duration, and time to PSA progression in these patients. To evaluate the immune response to Ad5CMV-NIS.		Clinical Trial	2008-2018	NCT00788307 : Gene Therapy and Radioactive Iodine in Treating Patients With Locally Recurrent Prostate Cancer That Did Not Respond to External-Beam Radiation Therapy
Genitourinary	Prostate	mutTKSR39rep-hIL12		Single intraprostatic injection of Ad5-yCD/mutTKSR39rep-hIL12 adenovirus at a dose of 1 x 10e10 to 1 x 10e12 viral particles.	Intraprostatic	Ad5-yCD	VIRAL	Phase I	Determine the dose-dependent toxicity and maximum tolerated dose (MTD)			Clinical Trial	2015-2022	NCT02555397 : Phase 1 Trial of Interleukin 12 Gene Therapy for Locally Recurrent Prostate Cancer
Head and neck	Squamous cell carcinoma (=HNSCC)	ASO anti STAT3			IV			Phase II				Clinical Trial	2023	NCT05814666 : Activity and Safety of Danvatirsen and Pembrolizumab in HNSCC (PEMDA-HN)
Thoracique	NSCLC	Plasmid TUSC2	TUSC 2 : TUSC2, also known as FUS1, is a tumor suppressor gene involved in regulating cell growth and preventing the formation of cancer. Its loss or inactivation is associated with various cancers, and research focuses on understanding its role in tumor development for potential therapeutic interventions		IV	ONCOPREX A CHERCHER	NON VIRAL	Phase I / II	determine the safety and efficacy of quaratusugene ozeplasmid (Reqorsa) added to osimertinib in NSCLC patients with activating EGFR mutations who have progressed while on treatment with osimertinib		Genprex	Clinical Trial	2021	NCT04486833Quaratusugene Ozeplasmid (Reqorsa) and Osimertinib in Patients With Advanced Lung Cancer Who Progressed on Osimertinib (Acclaim-1)
Thoracique		WT TP53	WT TP53			SGT 53 (DOTAP/DOPE)	NON VIRAL	Mouse model, ICI resist				Cells	2003-2011	A Novel P53 Nanomedicine Reduces Immunosuppression and Augments Anti-PD-1 Therapy for Non-Small Cell Lung Cancer in Syngeneic Mouse Models
Thoracique		IL-12	IL-12 : cytokine that plays a crucial role in the immune system's response to infections and cancers. It stimulates the production of interferon-gamma and promotes the differentiation of T cells, contributing to the enhancement of cellular immune responses	The starting dose of ADV/IL-12 will be 5 × 1011 vp. ADV/IL-12 dose level will de-escalate based on Dose Limiting Toxicity (DLT) occurrence: dose level -1, 3 × 1011 vp and dose level -2, 1 × 1011 vp. The starting dose, based on the dose range explored in prior studies, is expected to have activity and dosing changes are only in place in the event that toxicity is demonstrated. Starting on Day 2 of…	Intratumoral	AdV	VIRAL	Phase I	Safety of the atezolizumab and ADV/IL-12 gene therapy combination and will be determined using the Bayesian model averaging-continual reassessment method (BMA-CRM)			Clinical Trial	2022	NCT04911166 : Phase I Trial of Atezolizumab and Interleukin-12 Gene Therapy in Metastatic Non-Small Cell Lung Cancer With Progression on First-Line Immunotherapy With or Without Chemotherapy
Thoracique		ASO (modified MOE = methoxyethyl) anti mRNA HSP27	HSP27 :expressed in 70% NSCLC (commonly overexpressed in cancer cells, serving to stabilize mutated or inappropriately activated oncoproteins that contribute to initiation growth and metastasis of human cancers		IV	NA		Phase II				Clinical Trial	2018	NCT01829113 : Phase II Trial of Carboplatin and Pemetrexed +/​- OGX-427 in Untreated Stage IV Non-Squamous-Non-Small-Cell Lung Cancer (Spruce)
Thoracique	Aglatimagene besadenovec	HSV-Tk			injection into an accessible involved tumor site followed by 14 days of prodrug (valacyclovir or acyclovir).	AdV	VIRAL	Phase II				Clinical Trial	2020-2023	NCT04495153 :CAN-2409 Plus Prodrug With Standard of Care Immune Checkpoint Inhibitor for Stage III/IV NSCLC
Thoracique	Mesothelioma	IFN-α2b			intrapleural administration	AdV	VIRAL	Phase III	Compare the overall survival (OS) associated with rAd IFN, when administered with celecoxib and gemcitabine, versus that associated with celecoxib and gemcitabine alone for the treatment of patients with MPM who have failed a minimum of 1 treatment regimen and a maximum of 2 treatment regimens, 1 of which must have been an anti-folate and platinum combination regimen.		Trizell Ltd	Clinical Trial	2019-2024	NCT03710876 : Efficacy & Safety of rAd-IFN Administered With Celecoxib & Gemcitabine in Patients With Malignant Pleural Mesothelioma (INFINITE)
Thoracique	NSCLC or squamous oesophageal (MAGE-A3 and NY-ESO-1 proteins)	MAGE-A3 and NY-ESO-1 proteins)		NA	NA	Chimpanzee Adenovirus Oxford 1 (ChAdOx1-MAGEA3-NYESO)/ Modified Vaccinia Ankara (MVA) x2 MVA-MAGEA3 and MVA-NYESO	VIRAL	Phase I / II	Primary outcome: safety and tolerability		Cancer Research UK	Clinical Trial	2021	NCT04908111 : A Trial of ChAdOx1 and MVA Vaccines Against MAGE-A3 and NY-ESO-1 + NATURE CANCER (Cancer vaccines: the next immunotherapy frontier)
Thoracique	ADK
Thoracique	Mesothelioma (MPM)	HSV-1 1716			Intrapleural	oncolytic	VIRAL	Phase I-II				Clinical Trial	2017	NCT01721018 : Intrapleural Administration of HSV1716 to Treat Patients With Malignant Pleural Mesothelioma. (1716-12)
Thoracique	non-small cell lung cancer (NSCLC), or squamous oesophageal cancer : known to have MAGE-A3 and NY-ESO-1	MAGE-A3 - NY-ESO-1
Adrenocortical carcinoma(ACC) / Neuroendocrine Tumeur (NET)	Adrenocortical carcinoma(ACC) / Neuroendocrine Tumeur (NET)	sRNA anti PLK1	PLK1			LNP	NON VIRAL	Phase I/II				Clinical Trial	2019	NCT01262235 A Dose Finding Study of TKM-080301 Infusion in Neuroendocrine Tumors (NET) and Adrenocortical Carcinoma (ACC) Patients
melanoma	melanoma (malignant/metastatic)	CMH1 + GMCSF - HSV1 oncolytic	CMH1 + GMCSF : colony-stimulating factor to increase tumor-antigen presentation by dendritic cells		Intratumoral	replicate in tumor cells, enhance antigen loading of MHC class I molecules and express granulocyte-macrophage colony-stimulating factor to increase tumor-antigen presentation by dendritic cells.	VIRAL	Phase I-II/III				Human Vaccines & Immunotherapeutics	2018	Talimogene laherparepvec: First in class oncolytic virotherapy - HSV1 :Talimogene laherparepvec=TVEC (oncolytic virus)
melanoma		B7.1 (CD80) + IL2	B7.1 (CD80) - IL2 : CD80 (Cluster of Differentiation 80) presented on antigen-presenting cells, such as dendritic cells and B cells and IL-2 (Interleukin-2) are both important components of the immune system		B7.1 (CD80) 25.18^8pfu + IL2 2.10^6	Canary pox virus x2 (par Transgene)	VIRAL	Phase I				dont Nature	2005	Phase I Study of the Intratumoral Administration of Recombinant Canarypox Viruses Expressing B7.1 and Interleukin 12 in Patients with Metastatic Melanoma
melanoma	melanoma lung metastasis / B16F10 melanoma cells	shRNA eIF3i	eIF3i : eukaryotic translation initiation factor 3 subunit I, is a subunit of the eukaryotic translation initiation factor 3 (eIF3) complex. This complex is involved in the initiation of protein synthesis, a crucial step in the translation of mRNA into proteins. eIF3i is responsible for mediating the interaction between the mRNA and the 40S ribosomal subunit during the initiation phase of transla…			DOTAP, cholesterol, DSPE-PEG2000	NON VIRAL	PréC (in vitro + in vivo mice)				molecular pharmaceutics	2019	Cancer targeted gene therapy for inhibition of melanoma lung metastasis with eIF3i shRNA loaded liposomes (Eukaryotic translation initiation factors 3i (eIF3i) is a proto-oncogene)
melanoma		mRNA Autogene Cevumeran (RO7198457) : neo antigen			IV	LNP	NON VIRAL	Phase II	Progression-free Survival (PFS) According to Response Evaluation Criteria in Solid Tumors, Version 1.1 (RECISTv.1.1) After Randomization [ Time Frame: The time from randomization to disease progression/death (up to approximately 24 months) ]	Objective Response Rate (ORR) According to RECISTv.1.1 After Randomization [ Time Frame: Up to approximately 24 months ] Overall Survival (OS) After Randomization [ Time Frame: The time from randomization to death from any cause (up to approximately 24 months). ] Duration of Response (DOR) According to RECISTv.1.1 After Randomization [ Time Frame: The time from randomization up to approximately 2…	BioNTech SE	Clinical Trial	2019-2024	NCT03815058 : A Study to Evaluate the Efficacy and Safety of Autogene Cevumeran (RO7198457) in Combination With Pembrolizumab Versus Pembrolizumab Alone in Participants With Previously Untreated Advanced Melanoma. (
melanoma	Melanoma	IL-12 and GM-CSF	IL-12 - GM CSF : IL-12 (Interleukin-12) IL-12 stimulates the production of interferon-gamma, which enhances the cytotoxic activity of natural killer (NK) cells and cytotoxic T lymphocytes. And GM-CSF (Granulocyte-Macrophage Colony-Stimulating Factor) stimulates the production and function of granulocytes (such as neutrophils) and macrophages			HSV1	VIRAL	Pré-C (murine melanoma model)				Nature	2015-2023	Antitumor effects of IL-12 and GM-CSF co-expressed in an engineered oncolytic HSV-
melanoma	Melanoma	mRNA encoding neoantigen (screeening whole exome)			Intramuscular	LNP	NON VIRAL	Phase Iib			Moderna in collaboration with Merck Sharp & Dohme	the Lancet	2019 - 2029	NCT03897881 : An Efficacy Study of Adjuvant Treatment With the Personalized Cancer Vaccine mRNA-4157 and Pembrolizumab in Participants With High-Risk Melanoma (KEYNOTE-942)
melanoma	Melanome : VEGFR-positive B16-F10 cells	pRBDV gene (angio)	RBDV ?			DOPC, DLPC, PEG and PEI + IgG1 Fc	NON VIRAL	PréC (in vitro + in vivo mice)				Journal of Nanobiotechnology	2020	Lipoplex-based targeted gene therapy for the suppression of tumours with VEGFR expression by producing anti-angiogenic molecules
melanoma		(HSV-tk,cIFNbeta,hIL-2,hGM-CSF)pDNA	ganciclovir=>		Intratumoral/Peritumoral	Liposome : DMRJE/DOPE	NON VIRAL	Phase I				Clinical Trial	2017	NCT03338777 Suicide Plus Immune Gene Therapy for Advanced Melanoma (IGTM-101)HSV thymidine kinase: HSVt k) / prodrug (ganciclovir: GCV) with the immunostimulation of interleukin2 (hIL2) and immunoamplification of granulocyte and macrophage colony stimulating factor (hGMCSF) in the presence of tumor antigens
melanoma	Melanoma uveal	GM-CSF			Intravitreally	HSV-1	VIRAL	In vitro (cell lines, MUM2B, 92.1, and MP41) + PréC(BALB/c-nude mice in situ UM xenografts)				Cancer Managment and Reaserch	2017-2020	Antitumor Efficacy of Oncolytic Herpes Virus Type 1 Armed with GM-CSF in Murine Uveal Melanoma Xenografts
Others, multiple	Solid Tumor	siRNA VEGF-A - siRNA PLK1				LNP	NON VIRAL	Phase I				Clinical trial	2020	NCT01158079 Multi-center, Open Label, Extension Study of ALN-VSP02 in Cancer Patients Who Have Responded to ALN-VSP02 Treatment
Others, multiple	primary solides tumors and metastatic lesions	siRNA anti pI3k(oncogene)	pI3k (3 hot spot de mutation : Phosphoinositide 3-kinase, is a family of enzymes that play a crucial role in cellular signaling, particularly in regulating cell growth, proliferation, survival, and metabolism. There are different classes of PI3K, and they are involved in various cellular processes by generating lipid second messengers that activate downstream signaling pathways. Dysregulation of …			Atu 027	NON VIRAL	Phase I				Clinical Trial + resultats FIH	2014	NCT00938574 + First-in-human phase I study of the liposomal RNA interference therapeutic Atu027 in patients with advanced solid tumors
Others, multiple	Colorectal Cancer With Hepatic MetastasesPancreas Cancer With Hepatic MetastaseGastric Cancer With Hepatic MetastaseBreast Cancer With Hepatic MetastaseOvarian Cancer With Hepatic Metastase	siRNA anti PLK1				LNP	NON VIRAL	Phase I				Clinical Trial	2012	NCT01437007 TKM 080301 for Primary or Secondary Liver Cancer
Others, multiple	Solid Tumor, multiple myeloma, non H lymphoma	siRNA anti MYC				LNP	NON VIRAL	Phase I				Clinical Trial	2017	NCT02110563 Phase I, Multicenter, Dose Escalation Study of DCR-MYC in Patients With Solid Tumors, Multiple Myeloma, or Lymphoma
Others, multiple	Solid Tumor	siRNA anti EphA2				Liposome : DOPC	NON VIRAL	Phase I				Clinical Trial	2012-2023	NCT01591356 EphA2 siRNA in Treating Patients With Advanced or Recurrent Solid Tumors
Others, multiple	Recurrent Adult Acute Myeloid Leukemia Acute Lymphoblastic Leukemia Myelodysplastic Syndrome	ASO (antisens oligoN) anti GRB-2				Liposome neutral	NON VIRAL	Phase I				Clinical trial	2010-2020	NCT01159028 Clinical Trial of BP1001 (L-Grb-2 Antisense Oligonucleotide) in CML, AML, ALL & MDS
Others, multiple	Advanced and/​or Metastatic Cancer	shRNA anti STMN1	STMN1 : Stathmin 1, is a protein involved in the regulation of microtubule dynamics. It plays a critical role in cell division, migration, and intracellular transport by promoting microtubule depolymerization. Often associated with cancer progression, as its overexpression can contribute to increased cell proliferation and metastasis.			BIV (bilamellar invaginated vesicle) lipoplex (LP)	NON VIRAL	Phase I				Clinical trial	2018	NCT01505153 Phase I Intratumoral Pbi-shRNA STMN1 LP in Advanced and/​or Metastatic Cancer (STMN1-LP)
Others, multiple	Ewing Sarcoma (bone) Ewing sarcoma are characterised by a t(11; 22) (q24; q12) translocation resulting in the EWS/FLi1 fusion gene considered as a driver gene for the disease.	shRNA EWS/Fli1	Ewing sarcoma are characterised by a t(11; 22) (q24; q12) translocation resulting in the EWS/FLi1 fusion gene considered as a driver gene for the disease.		IV	Liposome	NON VIRAL	Phase I				Clinical Trial	2023	NCT02736565 Pbi-shRNA™ EWS/​FLI1 Type 1 LPX in Subjects With Advanced Ewing's Sarcoma
Others, multiple	Primary liver cancer or advanced or metastatic cancer with or without liver involvement or hematologic malignancies	miR-RX34 mimic	miR-RX34 known for its tumor-suppressive properties			Liposome	NON VIRAL	Phase I				Clinical Trial + Publi	2020	NCT 01829971 + Phase 1 study of MRX34, a liposomal miR-34a mimic, in patients with advanced solid tumours
Others, multiple	MDA‐MB‐231 (human breast adenocarcinoma line	siRNA anti MDR1	MDR1			covalently conjugated to TAT, MMP2, and Herceptin	NON VIRAL	PréC in vitro				j cell physiol	2019	Intelligent TAT-coupled anti-HER2 immunoliposomes knock downed MDR1 to produce chemosensitize phenotype of multidrug resistant carcinoma
Others, multiple	Primary Prostate Cancer and Bone Metastasis	ASO anti androgen receptor (AR)	AR			DPPC, DSPE-PEGMal/OCH3 , DOTAP, and cholesterol + iRGD (CRGDK/RGPD/EC) onto the surface of ASOloaded liposomes	NON VIRAL	PréC (in vitro + in vivo mice)				Advanced functionals materials	2021	iRGD-Liposomes Enhance Tumor Delivery and Therapeutic Efficacy of Antisense Oligonucleotide Drugs against Primary Prostate Cancer and Bone Metastasis
Others, multiple	Recurrent or Metastatic Head and Neck Squamous Cell Carcinoma and Other Tumors	WT TP53	WT TP53		Intra tumoral	AdV	VIRAL	Phase II				clinical trial	2020	NCT03544723 Safety and Efficacy of p53 Gene Therapy Combined With Immune Checkpoint Inhibitors in Solid Tumors
Others, multiple	KB-8-5 tumor xenograft in SCID mice	siRNA anti MDR1	MDR1			DOPE and lipoconjugate + Folate	NON VIRAL	PréC (in vitro + in vivo mice)				Pharmacics	2021	Folate-Equipped Cationic Liposomes Deliver Anti-MDR1-siRNA to the Tumor and Increase the Efficiency of Chemotherapy
Others, multiple	solid tumors	WT TP53	WT TP53			scFvTfR - DOTAPE - DOPE	NON VIRAL	Phase I				Clinical Trial	2014-2023	NCT02354547 A Study of SGT-53 in Children With Refractory or Recurrent Solid Tumors
Others, multiple	Urologic Neoplasms / Metastatic Bladder cancer / Urinary Tract Neoplasm	ASO 2'MOE anti HSP27 tumor cells			IV (200 - 1000mg) once/week			Phase II				Clinical Trial		NCT01454089 :
Others, multiple	Advanced and Refractory Pancreatic, Non-Small Cell Lung Cancer, and Mismatch Repair Deficient Colorectal Cancer	ASO anti STAT 3	STAT 3		IV			Phase II				Clinical Trial	2017 - 2024	NCT02983578 : Danvatirsen and Durvalumab in Treating Patients With Advanced and Refractory Pancreatic, Non-Small Cell Lung Cancer, and Mismatch Repair Deficient Colorectal Cancer
Others, multiple	Advanced/metastatic solid tumor or lymphoma	mRNA encoding OX40L	OX40L		Intratumoral	N/A	NON VIRAL	Phase I/II				Clinical Trial	2021	NCT03323398 :Dose Escalation and Efficacy Study of mRNA-2416 for Intratumoral Injection Alone and in Combination With Durvalumab for Participants With Advanced Malignancies
Others, multiple	Triple Negative Breast Cancer and Colorectal Cancer With Liver Metastases	GM-CSF			Intratumoral	HSV-1	VIRAL	Phase I				Clinical Trial	2017-2022	NCT03256344 : Study of Talimogene Laherparepvec With Atezolizumab for Triple Negative Breast Cancer and Colorectal Cancer With Liver Metastases
Others, multiple	Solid Cancer:Disease States: Advanced, Advanced - Metastatic, Advanced - Unresectable : Breast Carcinoma Non-Small Cell Lung Carcinoma Melanoma Basal Cell Carcinoma Colorectal Carcinoma Esophagogastric Carcinoma Hepatocellular Carcinoma Renal Cell Carcinoma Adenocarcinoma of the Gastroesophageal Junction Skin Squamous Cell Carcinoma	GM-CSF				HSV-2	VIRAL	Phase Ib/II	(sur 3ans)Subject incidence DLTs separately in Group A and B observed in monotherapy and combination cohorts and in each tumor type seperately in Part 2	(sur 5ans)Safety: Subject incidence of treatment-related and treatment-emergent adverse events in monotherapy and combination of Part 1 and each separate tumour type in Part 2		Clinical Trial	2016-2023	NCT02509507 :Trial to Evaluate the Safety of Talimogene Laherparepvec Injected Into Tumors Alone and in Combination With Systemic Pembrolizumab MK-3475-611/Keynote-611(essai basket = plusieurs types de cancers selon un profil moléculaire)
Others, multiple	Non- small- cell lung cancer, colorectal cancer, pancreatic adenocarcinoma	KRAS antigens : epitop G12D, G12V, G13D, and G12C	presentation enregistrée dans l'ordi : KRAS mRNA vaccine LNP		Intramuscular	LNP	NON VIRAL	Phase I	Assess the Safety and Tolerability of mRNA-5671/V941 as a Monotherapy and in Combination With Pembrolizumab		Merck Sharp & Dohme LLC	Clinical Trial	2019-2022	NCT03948763 : A Study of mRNA-5671/​V941 as Monotherapy and in Combination With Pembrolizumab (V941-001)
Others, multiple	solid tumors	miR-193a-3p	Multiple targets JKN1			LNP	NON VIRAL	Phase I	MTD/R2PD		InteRNA	Clinical trial	2020	NCT04675996 : First-in-Human Study of INT-1B3 in Patients With Advanced Solid Tumors
	relapsed/refractory solid tumor malignancies or lymphoma.	OX40 ligand, IL-23, IL-36γ			Intratumoral	LNP	NON VIRAL	Phase I			ModernaTX, Inc.	Clinical trial	2018	NCT03739931 Dose Escalation Study of mRNA-2752 for Intratumoral Injection to Participants in Advanced Malignancies
				Targeting Malignant Brain Tumors with Antibodies
		Transgene = Vecteur viral
		Plasmid = Nanoparticles			IFNalpha 2b = Direct effect : tumor growth inhibition, enhanced apoptosis indirect : Angiogenis inhibtion , immune response activation, Induction of cytokines
		SGT (systemic Gene therapy)
		Ecriture rouge LNP = chercher la composition
		Ecriture rouge pour AdV : chercher le serotype + ou promottor
		Delta E1 = Deletion

## Sheet: Approved GT - RNA based
	PRODUCT	Voie	Strategies	VECTORIZATION	Year (first approval)	Disease	Medical field		Country approuved	Sponsor	Price $ (US-EU)
Gendicine	recombinant p53 gene	IN VIVO	Trangene P53 wt	Recombinant Human p53 Adenovirus, AdRSV-p53	2004	Head and neck cancer; nasopharyngeal cancer	Cancer	1	China
Oncorine (H101) : Pour que la réplication de l'adénovirus ait lieu, la cellule hôte doit être induite en phase S par des protéines virales interférant avec des protéines du cycle cellulaire. Le gène E1A de l'adénovirus est responsable de l'inactivation de plusieurs protéines, dont le rétinoblastome, permettant ainsi l'entrée en phase S. Le gène E1B55kDa de l'adénovirus coopère avec un autre produ…	E1B/E3 deficient adenovirus	IN VIVO	Oncolytic targeting p53 mutant cells	rAdV5-H101(del E1B) = induces apoptosis	2005	Head and neck cancer; nasopharyngeal cancer	Cancer	1	China
RexinG replication-incompetent retroviral vector displaying a cryptic SIG-binding peptide for targeting abnormal Signature (SIG) proteins in tumors and encoding a dominantnegative human cyclin G1 construct.rétrovecteur amphotrope non réplicatif à base de MLV présentant un motif cryptique de liaison au collagène sur sa membrane de surface gp70 pour cibler les protéines Signature anormale (SIG) dan…	mutant cyclin-G1 gene	IN VIVO	encoding a dominant-negative mutant construct (dnG1) of human cyclin G1 (CCNG1)	Retrovial vector (MLV)	2006	Solid tumors	Cancer	1	Philippines	Epeius Biotechnologies
Glybera (withdrawn from the market due to insufficient ASMR)	alipogene tiparvovec	IN VIVO	Encoding human LPL gene	AAV1	2012	Familial lipoprotein lipase (LPL) deficiency with severe pancreatitis episodes	Genetic Disease	1	US + EU		1 million $
Imlygic=L01XX51	talimogene laherparepvec	IN VIVO intra Tum	GM-CSF	HSV NON REPLI (del ICP34.5 (replication) et ICP 47 (immune response blocker)	2015	Melanoma	Cancer	1	US, EU, UK, Australia + Switzerland (2016)	BioVex (Amgen)	65 000 $
Kymriah = L01XL04	tisagenlecleucel-t	EX VIVO (lentivirus)	anti CD 19	T Lymphocyte	2017	Acute lymphocytic leukemia; diffuse large B-cell lymphoma; follicular lymphoma	Cancer	1	US, EU, UK, Japan, Australia, Canada, South Korea, Switzerland	Novartis	475 000$
Luxturna	voretigene neparvovec	IN VIVO	Transgene RPE65	AAV2	2017	Leber’s congenital amaurosis; retinitis pigmentosa	Genetic Disease	1	US, EU, UK, Australia, Canada, South Korea, Japan	Spark	850 000 $ for 2 eyes	together with immunosuppressive treatment
Exondys 51	Eteplirsen	IN VIVO iv		naked	2016	Duchenne muscular dystrophy					$300,000–400,000 per year per patient
Spinraza	nusinersen	IN VIVO intrathecal	ASO anti mRNA SMN2	naked	2017	spinal amyotrophy 5q	Genetic Disease	1			500 K€ (first year) then 250 K€/year.	1 dose at days 0, 14, 28 and 63, then 1 dose evrey 4 months
Yescarta	axicabtagene ciloleucel	EX VIVO	anti CD 19	T Lymphocyte	2017	Diffuse large B-cell lymphoma; nonHodgkin’s lymphoma; follicular lymphoma	Cancer	1	US, EU, UK, Japan, Canada, China, Australia	Kite	373 k€
Onpattro	Patisiran	IN VIVO	iRNA (anti abnormal transthyretin)	LNP	2018	Hereditary transthyretin amyloidosis (hATTR amyloidosis)	Genetic Disease	1	EU, FDA	Alnylam	345k$ - 450k$/year	1 IV injection every 3 weeks
	beperminogene perplasmid				2019	Critical limb ischemia	CardioVascular	1	Japan
Zolgensma	onasemnogene abeparvovec	IN VIVO IV	Transgene SMN1	AAV9	2019	Spinal muscular atrophy	Genetic Disease	1	US, EU, UK, Japan, Australia, Canada, Brazil, Israel, Taiwan, South Korea	Novartis-avexis	2,5 million $ / 1,9 million $	one time injection (unique)
	betibeglogene autotemcel	EX VIVO		Autologous HSP(hematopoietic stem and progenitor) cells modified with a LVV carrying a form of the beta globin gene	2019	Transfusion-dependent beta thalassemia	Genetic Disease	1	US / EU (2020)	Bluebird	US : 2,8M$ EU : 1,8M€	one time injection (1,2 - 20.10^6 cells CD34+/mL) - unique
Tecartus = L01XL06	brexucabtagene autoleucel		anti CD 19	T Lymphocyte	2020	Mantle cell lymphoma; acute lymphocytic leukemia	Cancer	1	US, EU, UK, Australia
	atidarsagene autotemcel				2021	Metachromatic leukodystrophy	Genetic Disease	1	EU, UK
Breyanzi	lisocabtagene maraleucel	EX VIVO	anti CD 19	T lymphocyte (lentivirus)	2021	Diffuse large B-cell lymphoma; follicular lymphoma 3B;	Cancer	1	US, Japan, EU, Switzerland, UK, Canada	Juno . BMS	410 K$	One time unique injection / CD19+ (CD4+ or CD8+) vial 4,6mL cell dispersion 5.1-322.10^6CAR-T positive viable T cells
Abecma = L01XL07	idecabtagene vicleucel				2021	Multiple myeloma	Cancer	1	US, Canada, EU, UK, Japan	BMS
	teserpaturev			HSV-1 deletion α47	2021	Malignant glioma	Cancer	1	Japan
	relmacabtagene autoleucel	EX VIVO	anti CD 19	T lymphocyte	2021	Diffuse large B-cell lymphoma; follicular lymphoma	Cancer	1	China
	elivaldogene autotemcel				2021	Early cerebral adrenoleukodystrophy (CALD)	Genetic Disease	1	US
CARVYKTI = L01XL05	ciltacabtagene autoleucel	EX VIVO	anti BCMA	T lymphocyte (lentivirus)	2022	Multiple myeloma	Cancer	1	US, EU, UK, Japan, Australia
	eladocagene exuparvovec 2				2022	Aromatic L-amino acid decarboxylase (AADC) deficiency	Genetic Disease	1	EU, UK
Roctavian	valoctocogene roxaparvovec		Factor VIII	AAV5	2022	Hemophilia A	Genetic Disease	1	EU, UK, US
Hemgenix	etranacogene dezaparvovec	IN VIVO : IV	Factor IX gene	AAV5 non replicative / liver specific promotor	2022	Hemophilia B	Genetic Disease	1	US, EU, UK	CSL Behring LLC	3,5M$	1 time unique injection
ADSTILADRIN	nadofaragene firadenovec	IN VIVO intra Tum	Transgene (IFN)-α2b	AdV non replicative	2022	Bladder cancer	Cancer	1	US	Ferring Pharmaceuticals		Once every 3 months into the bladder via urinary catheter / 4x20mL, each contains 3x10^11 viral particles
ELEVIDYS	delandistrogene moxeparvovec	IN VIVO IV	Transgene : microdystrophin prot (full lengh = 427kbp =>troncated 138kbp)	AAVrh74 capsid and a ssDNA expression cassette flanked by ITR derived from AAV2	2023	Duchenne muscular dystrophy	Genetic Disease	1	US	Sarepta Therapeutics & Roche	3,2M$	One-time (single injection) : 1.33x10^14 vector genomes per kg of body weight or 10mL/kg body weight
VYJUVEK	beremagene geperpavec	IN VIVO ? = Topically	human collagen type VII alpha 1 chain (COL7A1)	HSV-1 Non repli	2023	Dystrophic epidermolysis bullosa	Genetic Disease	1	US	Krystal biotech	25 K$ / 2,5mL	Topical gel : 5.10^9PFU/mL sigle use vial (one application per week)
Fucaso	equecabtagene autoleucel	EX VIVO	anti BCMA	T lymphocyte (lentivirus)	2023	Multiple myeloma	Cancer	1	China
CASGEVY	exagamglogene automemcel	EX VIVO	erythroid-specific enhancer region of BCL11A.	autologous CD34+ hematopoietic stem and progenitor cells (HSPCs)	2023	Sickle Cell Disease / transfusion-dependent beta thalassemia (TDT)	Genetic Disease	1	US, EU, UK	Vertex Pharmaceuticals France	2.2 M$
